# Supplementary material for: Regulation of Apoptotic Mediators Reveals Dynamic Responses to Thermal Stress in the Reef Building Coral Acropora millepora
Source: PubMed Central journal article supplement (PMC3025915; doi:10.1371/journal.pone.0016095), 2011-01-24
Supplement: pone.0016095.s002.pdf [file pone.0016095.s002.pdf]

# BLAST

## Basic Local Alignment Search Tool

[Jump to Page Content](#)  
Job Title: EZ024706

### Tax BLAST Report

#### Index

- [Lineage Report](#)
- [Organism Report](#)
- [Taxonomy Report](#)
- [Help](#)

#### Lineage Report

|                                                           |         |                                                                           |
|-----------------------------------------------------------|---------|---------------------------------------------------------------------------|
| root                                                      |         |                                                                           |
| · Fungi/Metazoa group [eukaryotes]                        |         |                                                                           |
| · Metazoa [animals]                                       |         |                                                                           |
| · Eumetazoa [animals]                                     |         |                                                                           |
| · Hexacorallia [anthozoans]                               |         |                                                                           |
| · Scleractinia [stony corals]                             |         |                                                                           |
| · Acropora millepora -----                                | 1 hit   | [stony corals] TSA: Acropora millepora SeqIndex4149, mRNA sequence        |
| · Montastraea franksi -----                               | 1 hit   | [stony corals] Montastraea franksi ribosomal protein L12 (RibpL12) mRN    |
| · Anthopleura elegantissima -----                         | 1 hit   | [sea anemones] Anthopleura elegantissima ribosomal protein L12 mRNA, c    |
| · Nematostella vectensis -----                            | 1 hit   | [sea anemones] Nematostella vectensis predicted protein (NEMVEDRAFT v1    |
| · Microcosmus squamiger -----                             | 1 hit   | [tunicates] Microcosmus squamiger partial mRNA for ribosomal protei       |
| · Branchiostoma floridae -----                            | 1 hit   | [lancelets] Branchiostoma floridae hypothetical protein, mRNA             |
| · Pediculus humanus corporis (human body louse) -----     | 1 hit   | [lice] Pediculus humanus corporis 60S ribosomal protein L12, p            |
| · Patiria miniata -----                                   | 1 hit   | [starfish] TSA: Patiria miniata isotig10042.Pminbgast mRNA sequenc        |
| · Phragmatopoma lapidosa -----                            | 1 hit   | [segmented worms] Phragmatopoma lapidosa ribosomal-like protein mRNA, com |
| · Maconellicoccus hirsutus (pink hibiscus mealybug) ----- | 1 hit   | [scale insects] Maconellicoccus hirsutus clone WHMH4004 putative riboso   |
| · Nasonia vitripennis -----                               | 1 hit   | [wasps &c.] PREDICTED: Nasonia vitripennis similar to ribosomal pro       |
| · Solea senegalensis -----                                | 1 hit   | [bony fishes] Solea senegalensis RPL12 mRNA for ribosomal protein L12     |
| · Ornithodoros parkeri -----                              | 1 hit   | [mites & ticks] Ornithodoros parkeri clone OP-85 40S ribosomal protein    |
| · Ixodes scapularis (shoulder tick) -----                 | 2 hits  | [mites & ticks] Ixodes scapularis ribosomal protein L12, putative, mRNA   |
| · Dermacentor variabilis -----                            | 1 hit   | [mites & ticks] Dermacentor variabilis isolate DVM 40 ribosomal protein   |
| · Acyrthosiphon pisum -----                               | 5 hits  | [aphids] TSA: Acyrthosiphon pisum strain LSR1 Contig 60495.Acpii          |
| · Hypophthalmichthys nobilis (noble carp) -----           | 1 hit   | [bony fishes] Hypophthalmichthys nobilis ribosomal protein L12 mRNA, p    |
| · Salmo salar -----                                       | 3 hits  | [bony fishes] Salmo salar clone ssal-plnb-020-145 60S ribosomal prote     |
| · Rhipicephalus sanguineus -----                          | 1 hit   | [mites & ticks] TSA: Rhipicephalus sanguineus RS-401 mRNA sequence        |
| · Tribolium castaneum (rust-red flour beetle) -----       | 1 hit   | [beetles] PREDICTED: Tribolium castaneum similar to ribosomal pro         |
| · Eurythoe complanata -----                               | 1 hit   | [segmented worms] Eurythoe complanata ribosomal protein rpl12 mRNA, compl |
| · Phoronis muelleri -----                                 | 1 hit   | [phoronid worms] Phoronis muelleri putative 60S ribosomal protein RPL12   |
| · Anopheles gambiae str. PEST -----                       | 1 hit   | [flies] Anopheles gambiae str. PEST AGAP010065-PA (AgAp AGAP010           |
| · Anopheles gambiae -----                                 | 2 hits  | [flies] Single read from an extremity of a full-length cDNA clo           |
| · Timarcha balearica -----                                | 1 hit   | [beetles] Timarcha balearica mRNA for ribosomal protein L12e (rpL         |
| · Rhagoletis pomonella -----                              | 1 hit   | [flies] TSA: Rhagoletis pomonella contig09541, mRNA sequence              |
| · Saccoglossus kowalevskii -----                          | 1 hit   | [hemichordates] PREDICTED: Saccoglossus kowalevskii ribosomal protein L   |
| · Ciona intestinalis -----                                | 2 hits  | [tunicates] PREDICTED: Ciona intestinalis similar to predicted prot       |
| · Macaca mulatta (rhesus macaque) -----                   | 5 hits  | [primates] PREDICTED: Macaca mulatta 60S ribosomal protein L12-lik        |
| · Scarabaeus laticollis -----                             | 1 hit   | [beetles] Scarabaeus laticollis mRNA for ribosomal protein L12e (         |
| · Biphyllus lunatus -----                                 | 1 hit   | [beetles] Biphyllus lunatus mRNA for ribosomal protein L12e (rpL1         |
| · Drosophila pseudoobscura pseudoobscura -----            | 1 hit   | [flies] Drosophila pseudoobscura pseudoobscura GA16582 (Dpse/GA           |
| · Drosophila persimilis -----                             | 1 hit   | [flies] Drosophila persimilis GL11659 (Dper/GL11659), mRNA                |
| · Sarcophaga crassipalpis -----                           | 1 hit   | [flies] TSA: Sarcophaga crassipalpis HAHN.FLY.99.C1 mRNA sequen           |
| · Argopecten irradians -----                              | 1 hit   | [bivalves] Argopecten irradians isolate iolsaic1413ct453cn476 ribo        |
| · Schistosoma japonicum -----                             | 8 hits  | [flatworms] Schistosoma japonicum isolate Anhui full length mRNA cl       |
| · Drosophila mojavensis -----                             | 1 hit   | [flies] Drosophila mojavensis GI18857 (Dmoj\GI18857), mRNA                |
| · Anopheles funestus -----                                | 1 hit   | [flies] Anopheles funestus clone AF-44 ribosomal protein L12 mR           |
| · Rattus norvegicus (brown rat) -----                     | 4 hits  | [rodents] PREDICTED: Rattus norvegicus similar to 60S ribosomal p         |
| · Drosophila virilis -----                                | 1 hit   | [flies] Drosophila virilis GJ20445 (Dvir\GJ20445), mRNA                   |
| · Flustra foliacea -----                                  | 1 hit   | [bryozoans] Flustra foliacea putative 60S ribosomal protein RPL12 m       |
| · Rattus rattus (roof rat) -----                          | 1 hit   | [rodents] Rat mRNA for ribosomal protein L12                              |
| · Mustela putorius furo (ferret) -----                    | 1 hit   | [carnivores] TSA: Mustela putorius furo Ferret cl444, complete seque      |
| · Mus musculus (mouse) -----                              | 14 hits | [rodents] Mus musculus predicted pseudogene 10275 (Gm10275) on ch         |
| · Pongo abelii (Orang-utan) -----                         | 4 hits  | [primates] PREDICTED: Pongo abelii 60S ribosomal protein L12-like,        |
| · Callithrix jacchus (common marmoset) -----              | 1 hit   | [primates] PREDICTED: Callithrix jacchus 60S ribosomal protein L12        |
| · Pan troglodytes -----                                   | 3 hits  | [primates] PREDICTED: Pan troglodytes similar to 60S ribosomal pro        |
| · Homo sapiens (man) -----                                | 5 hits  | [primates] Homo sapiens cDNA clone IMAGE:6597277, **** WARNING: ch        |
| · Trichoplax adhaerens -----                              | 1 hit   | [placozoans] Trichoplax adhaerens expressed hypothetical protein, mR      |
| · Suberites domuncula -----                               | 1 hit   | [sponges] Suberites domuncula L12 mRNA, complete cds                      |
| · Coprinopsis cinerea okayama7#130 -----                  | 1 hit   | [basidiomycetes] Coprinopsis cinerea okayama7#130 SeqLit ribosomal prote  |
| · Schizophyllum commune H4-8 -----                        | 1 hit   | [basidiomycetes] Schizophyllum commune H4-8 hypothetical protein, mRNA    |
| · Laccaria bicolor S238N-H82 -----                        | 1 hit   | [basidiomycetes] Laccaria bicolor S238N-H82 hypothetical protein partial  |
| · synthetic construct -----                               | 2 hits  | [other sequences] Synthetic construct Homo sapiens clone FLH029540.01L ri |

#### Organism Report

|                                                                                                                                                                   |     |
|-------------------------------------------------------------------------------------------------------------------------------------------------------------------|-----|
| <a href="#">Acropora millepora</a> [stony corals] taxid 45264<br><a href="#">gb EZ024706.1</a> TSA: Acropora millepora SeqIndex4149, mRNA ...                     | 0.0 |
| <a href="#">Anthopleura elegantissima</a> [sea anemones] taxid 6110<br><a href="#">gb DQ314616.1</a> Anthopleura elegantissima ribosomal protein...               | 0.0 |
| <a href="#">Microcosmus squamiger</a> [tunicates] taxid 439822<br><a href="#">emb FN984766.1</a> Microcosmus squamiger partial mRNA for rib...                    | 0.0 |
| <a href="#">Branchiostoma floridae</a> [lancelets] taxid 7739<br><a href="#">ref XM_002591796.1</a> Branchiostoma floridae hypothetical pr...                     | 0.0 |
| <a href="#">Pediculus humanus corporis</a> (human body louse) [lice] taxid 121224<br><a href="#">ref XM_002425415.1</a> Pediculus humanus corporis 60S ribosom... | 0.0 |
| <a href="#">Patiria miniata</a> [starfish] taxid 46514<br><a href="#">gb HP092325.1</a> TSA: Patiria miniata isotig10042.Pminbgast ...                            | 0.0 |
| <a href="#">Nematostella vectensis</a> [sea anemones] taxid 45351<br><a href="#">ref XM_001641997.1</a> Nematostella vectensis predicted prote...                 | 0.0 |
| <a href="#">Phragmatopoma lapidosa</a> [segmented worms] taxid 341668<br><a href="#">gb GQ455407.1</a> Phragmatopoma lapidosa ribosomal-like prote...             | 0.0 |
| <a href="#">Maconellicoccus hirsutus</a> (pink hibiscus mealybug, ...) [scale insects] taxid 177089                                                               |     |

[gb|EF070571.1|](#) *Maconellicoccus hirsutus* clone WHMH4004 put... 0.0  
[Nasonia vitripennis](#) [wasps &c.] taxid 7425  
[ref|XM 001605592.1|](#) PREDICTED: *Nasonia vitripennis* similar... 0.0  
[Solea senegalensis](#) [bony fishes] taxid 28829  
[dbj|AB374947.1|](#) *Solea senegalensis* RPL12 mRNA for ribosoma... 0.0  
[Trichoplax adhaerens](#) [placozoans] taxid 10228  
[ref|XM 002108586.1|](#) *Trichoplax adhaerens* expressed hypothe... 0.0  
[Ornithodoros parkeri](#) [mites & ticks] taxid 140564  
[gb|EF633964.1|](#) *Ornithodoros parkeri* clone OP-85 40S riboso... 0.0  
[Ixodes scapularis](#) (shoulder tick, ...) [mites & ticks] taxid 6945  
[ref|XM 002433985.1|](#) *Ixodes scapularis* ribosomal protein L1... 0.0  
[gb|DQ066203.1|](#) *Ixodes scapularis* isolate ISUFL56 ribosomal... 0.0  
[Dermacentor variabilis](#) [mites & ticks] taxid 34621  
[gb|EU551645.1|](#) *Dermacentor variabilis* isolate DvM 40 ribos... 0.0  
[Coprinopsis cinerea okayama7#130](#) [basidiomycetes] taxid 240176  
[ref|XM 001830397.2|](#) *Coprinopsis cinerea* okayama7#130 SeqLi... 0.0  
[Acyrtosiphon pisum](#) [aphids] taxid 7029  
[gb|HP395106.1|](#) TSA: *Acyrtosiphon pisum* strain LSR1 Contig... 0.0  
[gb|HP301142.1|](#) TSA: *Acyrtosiphon pisum* strain LSR1 Contig... 0.0  
[dbj|AK340119.1|](#) *Acyrtosiphon pisum* ACYPI000059 mRNA, clon... 0.0  
[ref|NM 001126171.2|](#) *Acyrtosiphon pisum* ribosomal protein ... 0.0  
[gb|DQ416025.1|](#) *Acyrtosiphon pisum* putative ribosomal prot... 0.0  
[Hypophthalmichthys nobilis](#) (noble carp, ...) [bony fishes] taxid 7965  
[gb|HM146124.1|](#) *Hypophthalmichthys nobilis* ribosomal protei... 0.0  
[Salmo salar](#) [bony fishes] taxid 8030  
[gb|BT048569.2|](#) *Salmo salar* clone ssal-plnb-020-145 60S rib... 0.0  
[gb|BT056663.1|](#) *Salmo salar* clone ssal-rgb2-526-129 60S rib... 0.0  
[gb|BT043744.1|](#) *Salmo salar* clone HM6\_0646 ribosomal protei... 0.0  
[Rhipicephalus sanguineus](#) [mites & ticks] taxid 34632  
[gb|EZ406119.1|](#) TSA: *Rhipicephalus sanguineus* RS-401 mRNA s... 0.0  
[Tribolium castaneum](#) (rust-red flour beetle) [beetles] taxid 7070  
[ref|XM 970437.2|](#) PREDICTED: *Tribolium castaneum* similar to... 0.0  
[Eurythoe complanata](#) [segmented worms] taxid 167815  
[gb|EU125012.1|](#) *Eurythoe complanata* ribosomal protein rpl12... 0.0  
[Schizophyllum commune H4-8](#) [basidiomycetes] taxid 578458  
[ref|XM 003029870.1|](#) *Schizophyllum commune* H4-8 hypothetica... 0.0  
[Phoronis muelleri](#) [phoronid worms] taxid 478209  
[gb|EU558362.1|](#) *Phoronis muelleri* putative 60S ribosomal pr... 0.0  
[Anopheles gambiae str. PEST](#) [flies] taxid 180454  
[ref|XM 319222.4|](#) *Anopheles gambiae* str. PEST AGAP010065-PA... 0.0  
[Anopheles gambiae](#) [flies] taxid 7165  
[emb|BX063995.1|](#) Single read from an extremity of a full-le... 0.0  
[emb|BX009066.1|](#) Single read from an extremity of a full-le... 0.0  
[Suberites domuncula](#) [sponges] taxid 55567  
[gb|AY857425.1|](#) *Suberites domuncula* L12 mRNA, complete cds 0.0  
[Timarcha balearica](#) [beetles] taxid 79517  
[emb|AM049032.1|](#) *Timarcha balearica* mRNA for ribosomal prot... 0.0  
[Rhaagoletis pomonella](#) [flies] taxid 28610  
[gb|EZ125760.1|](#) TSA: *Rhaagoletis pomonella* contig09541, mRNA... 0.0  
[Saccoglossus kowalevskii](#) [hemichordates] taxid 10224  
[ref|XM 002741431.1|](#) PREDICTED: *Saccoglossus kowalevskii* ri... 0.0  
[Ciona intestinalis](#) [tunicates] taxid 7719  
[ref|XM 002131525.1|](#) PREDICTED: *Ciona intestinalis* similar ... 0.0  
[dbj|AK113209.1|](#) *Ciona intestinalis* cDNA, clone:ciad015019,... 0.0  
[Macaca mulatta](#) (rhesus macaque, ...) [primates] taxid 9544  
[ref|XR 014217.2|](#) PREDICTED: *Macaca mulatta* 60S ribosomal p... 0.0  
[ref|NM 001193560.1|](#) *Macaca mulatta* ribosomal protein L12 (... 0.0  
[ref|XM 001114984.2|](#) PREDICTED: *Macaca mulatta* 60S ribosoma... 0.0  
[ref|XM 002801377.1|](#) PREDICTED: *Macaca mulatta* 60S ribosoma... 0.0  
[ref|XM 002801376.1|](#) PREDICTED: *Macaca mulatta* 60S ribosoma... 0.0  
[Laccaria bicolor S238N-H82](#) [basidiomycetes] taxid 486041  
[ref|XM 001880189.1|](#) *Laccaria bicolor* S238N-H82 hypothetica... 0.0  
[Scarabaeus laticollis](#) [beetles] taxid 292456  
[emb|AM049030.1|](#) *Scarabaeus laticollis* mRNA for ribosomal p... 0.0  
[Biphyllus lunatus](#) [beetles] taxid 197003  
[emb|AM049028.1|](#) *Biphyllus lunatus* mRNA for ribosomal prote... 0.0  
[Drosophila pseudoobscura pseudoobscura](#) [flies] taxid 46245  
[ref|XM 001360854.2|](#) *Drosophila pseudoobscura pseudoobscura*... 0.0  
[Drosophila persimilis](#) [flies] taxid 7234  
[ref|XM 002016543.1|](#) *Drosophila persimilis* GL11659 (Dper\GL... 0.0  
[Sarcophaga crassipalpis](#) [flies] taxid 59312  
[gb|EZ597013.1|](#) TSA: *Sarcophaga crassipalpis* HAHN.FLY.99.C1... 0.0  
[Argopecten irradians](#) [bivalves] taxid 31199  
[gb|AF526229.1|](#) *Argopecten irradians* isolate iolsaic1413ct4... 0.0  
[Schistosoma japonicum](#) [flatworms] taxid 6182  
[emb|FN315220.1|](#) *Schistosoma japonicum* isolate Anhui full l... 0.0  
[emb|FN315219.1|](#) *Schistosoma japonicum* isolate Anhui full l... 0.0

|                                                                                          |                                                 |     |
|------------------------------------------------------------------------------------------|-------------------------------------------------|-----|
| <a href="#">emb FN320441.1 </a>                                                          | Schistosoma japonicum isolate Anhui full l...   | 0.0 |
| <a href="#">emb FN320440.1 </a>                                                          | Schistosoma japonicum isolate Anhui full l...   | 0.0 |
| <a href="#">emb FN320439.1 </a>                                                          | Schistosoma japonicum isolate Anhui full l...   | 0.0 |
| <a href="#">emb FN320438.1 </a>                                                          | Schistosoma japonicum isolate Anhui full l...   | 0.0 |
| <a href="#">emb FN320436.1 </a>                                                          | Schistosoma japonicum isolate Anhui full l...   | 0.0 |
| <a href="#">gb AY814172.1 </a>                                                           | Schistosoma japonicum SJCHGC06254 protein m...  | 0.0 |
| <br>                                                                                     |                                                 |     |
| <b>Montastraea franksi</b> [ <a href="#">stony corals</a> ] taxid 48499                  |                                                 |     |
| <a href="#">gb FJ790233.1 </a>                                                           | Montastraea franksi ribosomal protein L12 (...) | 0.0 |
| <br>                                                                                     |                                                 |     |
| <b>Drosophila mojavensis</b> [ <a href="#">flies</a> ] taxid 7230                        |                                                 |     |
| <a href="#">ref XM_002005813.1 </a>                                                      | Drosophila mojavensis GI18857 (Dmoj\GI...       | 0.0 |
| <br>                                                                                     |                                                 |     |
| <b>Anopheles funestus</b> [ <a href="#">flies</a> ] taxid 62324                          |                                                 |     |
| <a href="#">gb DQ910352.1 </a>                                                           | Anopheles funestus clone AF-44 ribosomal pr...  | 0.0 |
| <br>                                                                                     |                                                 |     |
| <b>Rattus norvegicus</b> (brown rat, ...) [ <a href="#">rodents</a> ] taxid 10116        |                                                 |     |
| <a href="#">ref XM_001056336.2 </a>                                                      | PREDICTED: Rattus norvegicus similar t...       | 0.0 |
| <a href="#">ref XM_002727523.1 </a>                                                      | PREDICTED: Rattus norvegicus similar t...       | 0.0 |
| <a href="#">gb BC166903.1 </a>                                                           | Rattus norvegicus similar to 60S ribosomal ...  | 0.0 |
| <a href="#">ref NM_001109198.1 </a>                                                      | Rattus norvegicus similar to 60S ribosom...     | 0.0 |
| <br>                                                                                     |                                                 |     |
| <b>Drosophila virilis</b> [ <a href="#">flies</a> ] taxid 7244                           |                                                 |     |
| <a href="#">ref XM_002049947.1 </a>                                                      | Drosophila virilis GJ20445 (Dvir\GJ204...       | 0.0 |
| <br>                                                                                     |                                                 |     |
| <b>Flustra foliacea</b> [ <a href="#">bryozoans</a> ] taxid 478208                       |                                                 |     |
| <a href="#">gb EU139209.1 </a>                                                           | Flustra foliacea putative 60S ribosomal pro...  | 0.0 |
| <br>                                                                                     |                                                 |     |
| <b>Rattus rattus</b> (roof rat, ...) [ <a href="#">rodents</a> ] taxid 10117             |                                                 |     |
| <a href="#">emb X53504.1 </a>                                                            | Rat mRNA for ribosomal protein L12              | 0.0 |
| <br>                                                                                     |                                                 |     |
| <b>Mustela putorius furo</b> (ferret, ...) [ <a href="#">carnivores</a> ] taxid 9669     |                                                 |     |
| <a href="#">gb EZ457883.1 </a>                                                           | TSA: Mustela putorius furo Ferret_c1444, co...  | 0.0 |
| <br>                                                                                     |                                                 |     |
| <b>Mus musculus</b> (mouse) [ <a href="#">rodents</a> ] taxid 10090                      |                                                 |     |
| <a href="#">ref NG_004759.6 </a>                                                         | Mus musculus predicted pseudogene 10275 (...)   | 0.0 |
| <a href="#">ref NG_007061.2 </a>                                                         | Mus musculus predicted gene 9396 (Gm9396)...    | 0.0 |
| <a href="#">ref NM_009076.3 </a>                                                         | Mus musculus ribosomal protein L12 (Rp112...    | 0.0 |
| <a href="#">gb AC121149.12 </a>                                                          | Mus musculus chromosome 3, clone RP24-383A...   | 0.0 |
| <a href="#">gb BC081469.1 </a>                                                           | Mus musculus ribosomal protein L12, mRNA (c...  | 0.0 |
| <a href="#">gb AC164078.4 </a>                                                           | Mus musculus chromosome 3, clone RP23-123C1...  | 0.0 |
| <a href="#">gb AC166262.3 </a>                                                           | Mus musculus BAC RP23-256D10 (Roswell Park...   | 0.0 |
| <a href="#">dbj AK150318.1 </a>                                                          | Mus musculus bone marrow macrophage cDNA, ...   | 0.0 |
| <a href="#">dbj AK168121.1 </a>                                                          | Mus musculus CRL-1722 L5178Y-R cDNA, RIKEN...   | 0.0 |
| <a href="#">dbj AK144905.1 </a>                                                          | Mus musculus lung RCB-0558 LLC cDNA, RIKEN...   | 0.0 |
| <a href="#">dbj AK151592.1 </a>                                                          | Mus musculus bone marrow macrophage cDNA, ...   | 0.0 |
| <a href="#">dbj AK151532.1 </a>                                                          | Mus musculus bone marrow macrophage cDNA, ...   | 0.0 |
| <a href="#">gb BC090393.1 </a>                                                           | Mus musculus ribosomal protein L12, mRNA (c...  | 0.0 |
| <a href="#">gb AC118620.10 </a>                                                          | Mus musculus chromosome 3, clone RP24-571H...   | 0.0 |
| <br>                                                                                     |                                                 |     |
| <b>Pongo abelii</b> (Orang-utan, ...) [ <a href="#">primates</a> ] taxid 9601            |                                                 |     |
| <a href="#">ref XM_002821249.1 </a>                                                      | PREDICTED: Pongo abelii 60S ribosomal ...       | 0.0 |
| <a href="#">ref XM_002821248.1 </a>                                                      | PREDICTED: Pongo abelii 60S ribosomal ...       | 0.0 |
| <a href="#">ref XM_002821247.1 </a>                                                      | PREDICTED: Pongo abelii 60S ribosomal ...       | 0.0 |
| <a href="#">ref XM_002820230.1 </a>                                                      | PREDICTED: Pongo abelii 60S ribosomal ...       | 0.0 |
| <br>                                                                                     |                                                 |     |
| <b>Callithrix jacchus</b> (common marmoset, ...) [ <a href="#">primates</a> ] taxid 9483 |                                                 |     |
| <a href="#">ref XM_002754372.1 </a>                                                      | PREDICTED: Callithrix jacchus 60S ribo...       | 0.0 |
| <br>                                                                                     |                                                 |     |
| <b>Pan troglodytes</b> [ <a href="#">primates</a> ] taxid 9598                           |                                                 |     |
| <a href="#">ref XM_528436.2 </a>                                                         | PREDICTED: Pan troglodytes similar to 60S...    | 0.0 |
| <a href="#">ref XM_001137362.1 </a>                                                      | PREDICTED: Pan troglodytes similar to ...       | 0.0 |
| <a href="#">ref XM_516562.2 </a>                                                         | PREDICTED: Pan troglodytes similar to rib...    | 0.0 |
| <br>                                                                                     |                                                 |     |
| <b>Homo sapiens</b> (man) [ <a href="#">primates</a> ] taxid 9606                        |                                                 |     |
| <a href="#">gb BC085006.1 </a>                                                           | Homo sapiens cDNA clone IMAGE:6597277, ****...  | 0.0 |
| <a href="#">gb BC071921.1 </a>                                                           | Homo sapiens cDNA clone IMAGE:6423605, ****...  | 0.0 |
| <a href="#">gb BC001802.1 </a>                                                           | Homo sapiens cDNA clone IMAGE:3355546, ****...  | 0.0 |
| <a href="#">emb CR625201.1 </a>                                                          | full-length cDNA clone CS0DC011Y115 of Neu...   | 0.0 |
| <a href="#">emb CR622190.1 </a>                                                          | full-length cDNA clone CS0DL009Y118 of B c...   | 0.0 |
| <br>                                                                                     |                                                 |     |
| <b>synthetic construct</b> [ <a href="#">other sequences</a> ] taxid 32630               |                                                 |     |
| <a href="#">gb AY891709.1 </a>                                                           | Synthetic construct Homo sapiens clone FLH0...  | 0.0 |
| <a href="#">gb AY889175.1 </a>                                                           | Synthetic construct Homo sapiens clone FLH0...  | 0.0 |

## Taxonomy Report

|                                      |          |                                                                 |
|--------------------------------------|----------|-----------------------------------------------------------------|
| root                                 | 100 hits | 54 orgs                                                         |
| . Fungi/Metazoa group                | 98 hits  | 53 orgs [cellular organisms; Eukaryota]                         |
| . . Metazoa                          | 95 hits  | 50 orgs                                                         |
| . . . Eumetazoa                      | 93 hits  | 48 orgs                                                         |
| . . . . Hexacorallia                 | 4 hits   | 4 orgs [Cnidaria; Anthozoa]                                     |
| . . . . Scleractinia                 | 2 hits   | 2 orgs                                                          |
| . . . . . Acropora millepora         | 1 hits   | 1 orgs [Astrocoeniina; Acroporidae; Acropora]                   |
| . . . . . Montastraea franksi        | 1 hits   | 1 orgs [Faviina; Faviidae; Montastraea]                         |
| . . . . . Actiniaria                 | 2 hits   | 2 orgs                                                          |
| . . . . . Anthopleura elegantissima  | 1 hits   | 1 orgs [Nynantheae; Actiniidae; Anthopleura]                    |
| . . . . . Nematostella vectensis     | 1 hits   | 1 orgs [Edwardsiidae; Nematostella]                             |
| . . . Bilateria                      | 89 hits  | 44 orgs                                                         |
| . . . . Coelomata                    | 81 hits  | 43 orgs                                                         |
| . . . . . Deuterostomia              | 49 hits  | 17 orgs                                                         |
| . . . . . Chordata                   | 47 hits  | 15 orgs                                                         |
| . . . . . Ascidiacea                 | 3 hits   | 2 orgs [Tunicata]                                               |
| . . . . . Microcosmus squamiger      | 1 hits   | 1 orgs [Stolidobranchia; Pyuridae; Microcosmus]                 |
| . . . . . Ciona intestinalis         | 2 hits   | 1 orgs [Enterogona; Phlebobranchia; Cionidae; Ciona]            |
| . . . . . Branchiostoma floridae     | 1 hits   | 1 orgs [Cephalochordata; Branchiostomidae; Branchiostoma]       |
| . . . . . Euteleostomi               | 43 hits  | 12 orgs [Craniata; Vertebrata; Gnathostomata; Teleostomi]       |
| . . . . . Clupeocephala              | 5 hits   | 3 orgs [Actinopterygii; Actinopteri; Neopterygii; Teleostei; E  |
| . . . . . Euteleostei                | 4 hits   | 2 orgs                                                          |
| . . . . . Solea senegalensis         | 1 hits   | 1 orgs [Neognathi; Neoteleostei; Eurypterygii; Ctenosquamata; . |
| . . . . . Salmo salar                | 3 hits   | 1 orgs [Protacanthopterygii; Salmoniformes; Salmonidae; Salmo]  |
| . . . . . Hypophthalmichthys nobilis | 1 hits   | 1 orgs [Otocephala; Ostariophysi; Otophysi; Cypriniformes; Cypr |
| . . . . . Eutheria                   | 38 hits  | 9 orgs [Sarcopterygii; Tetrapoda; Amniota; Mammalia; Theria]    |
| . . . . . Euarchontoglires           | 37 hits  | 8 orgs                                                          |
| . . . . . Simiiformes                | 18 hits  | 5 orgs [Primates; Haplorrhini]                                  |
| . . . . . Catarrhini                 | 17 hits  | 4 orgs                                                          |
| . . . . . Macaca mulatta             | 5 hits   | 1 orgs [Cercopithecoidea; Cercopithecidae; Cercopithecinae; Ma  |
| . . . . . Hominidae                  | 12 hits  | 3 orgs [Hominoidea]                                             |
| . . . . . Pongo abelii               | 4 hits   | 1 orgs [Ponginae; Pongo]                                        |

|                                                    |         |                                                                  |
|----------------------------------------------------|---------|------------------------------------------------------------------|
| ..... Homininae .....                              | 8 hits  | 2 orgs                                                           |
| ..... Pan troglodytes .....                        | 3 hits  | 1 orgs [Pan]                                                     |
| ..... Homo sapiens .....                           | 5 hits  | 1 orgs [Homo]                                                    |
| ..... Callithrix jacchus .....                     | 1 hits  | 1 orgs [Platyrrhini; Cebidae; Callitrichinae; Callithrix]        |
| ..... Murinae .....                                | 19 hits | 3 orgs [Glires; Rodentia; Sciurognathi; Muroidea; Muridae]       |
| ..... Rattus .....                                 | 5 hits  | 2 orgs                                                           |
| ..... Rattus norvegicus .....                      | 4 hits  | 1 orgs                                                           |
| ..... Rattus rattus .....                          | 1 hits  | 1 orgs                                                           |
| ..... Mus musculus .....                           | 14 hits | 1 orgs [Mus; Mus]                                                |
| ..... Mustela putorius furo .....                  | 1 hits  | 1 orgs [Laurasiatheria; Carnivora; Caniformia; Mustelidae; Mus]  |
| ..... Patiria miniata .....                        | 1 hits  | 1 orgs [Echinodermata; Eleutherozoa; Asterozoa; Asteroidea; Va]  |
| ..... Saccoglossus kowalevskii .....               | 1 hits  | 1 orgs [Hemichordata; Enteropneusta; Harrimaniidae; Saccogloss]  |
| ..... Protostomia .....                            | 32 hits | 26 orgs                                                          |
| ..... Arthropoda .....                             | 27 hits | 21 orgs [Panarthropoda]                                          |
| ..... Neoptera .....                               | 22 hits | 17 orgs [Mandibulata; Pancrustacea; Hexapoda; Insecta; Dicondyl] |
| ..... Paraneoptera .....                           | 7 hits  | 3 orgs                                                           |
| ..... Pediculus humanus corporis .....             | 1 hits  | 1 orgs [Phthiraptera; Anoplura; Pediculidae; Pediculus; Pedicu]  |
| ..... Aphidiformes .....                           | 6 hits  | 2 orgs [Hemiptera; Sternorrhyncha]                               |
| ..... Maconellicoccus hirsutus .....               | 1 hits  | 1 orgs [Coccoidea; Pseudococcidae; Maconellicoccus]              |
| ..... Acyrthosiphon pisum .....                    | 5 hits  | 1 orgs [Aphidomorpha; Aphidoidea; Aphididae; Aphidinae; Macros]  |
| ..... Endopterygota .....                          | 15 hits | 14 orgs                                                          |
| ..... Nasonia vitripennis .....                    | 1 hits  | 1 orgs [Hymenoptera; Apocrita; Chalcidoidea group; Chalcidoide]  |
| ..... Polyphaga .....                              | 4 hits  | 4 orgs [Coleoptera]                                              |
| ..... Cucujiformia .....                           | 3 hits  | 3 orgs                                                           |
| ..... Tribolium castaneum .....                    | 1 hits  | 1 orgs [Tenebrionoidea; Tenebrionidae; Tribolium]                |
| ..... Timarcha balearica .....                     | 1 hits  | 1 orgs [Chrysomeloidea; Chrysomelidae; Chrysomelinae; Timarchi]  |
| ..... Biphyllus lunatus .....                      | 1 hits  | 1 orgs [Cucujoidea; Biphyllidae; Biphyllus]                      |
| ..... Scarabaeus laticollis .....                  | 1 hits  | 1 orgs [Scarabaeiformia; Scarabaeoidea; Scarabaeidae; Scarabae]  |
| ..... Diptera .....                                | 10 hits | 9 orgs                                                           |
| ..... Cellia .....                                 | 4 hits  | 3 orgs [Nematocera; Culicimorpha; Culicoidea; Culicidae; Anoph]  |
| ..... gambiae species complex .....                | 3 hits  | 2 orgs [Pyretophorus]                                            |
| ..... Anopheles gambiae .....                      | 3 hits  | 2 orgs                                                           |
| ..... Anopheles gambiae str. PEST .....            | 1 hits  | 1 orgs                                                           |
| ..... Anopheles funestus .....                     | 1 hits  | 1 orgs [Myzomyia; funestus group; funestus subgroup]             |
| ..... Schizophora .....                            | 6 hits  | 6 orgs [Brachycera; Muscomorpha; Eremoneura; Cyclorrhapha]       |
| ..... Acalypttratae .....                          | 5 hits  | 5 orgs                                                           |
| ..... Rhagoletis pomonella .....                   | 1 hits  | 1 orgs [Tephritoidea; Tephritidae; Trypetinae; Carpomyini; Car]  |
| ..... Drosophila .....                             | 4 hits  | 4 orgs [Ephydroidea; Drosophilidae; Drosophilinae; Drosophilin]  |
| ..... pseudoobscura subgroup .....                 | 2 hits  | 2 orgs [Sophophora; obscura group]                               |
| ..... Drosophila pseudoobscura pseudoobscura ..... | 1 hits  | 1 orgs [Drosophila pseudoobscura]                                |
| ..... Drosophila persimilis .....                  | 1 hits  | 1 orgs                                                           |
| ..... Drosophila .....                             | 2 hits  | 2 orgs                                                           |
| ..... Drosophila mojavensis .....                  | 1 hits  | 1 orgs [repleta group; mulleri subgroup; mojavensis species co]  |
| ..... Drosophila virilis .....                     | 1 hits  | 1 orgs [virilis group]                                           |
| ..... Sarcophaga crassipalpis .....                | 1 hits  | 1 orgs [Calypttratae; Oestroidea; Sarcophagidae; Sarcophaginae;] |
| ..... Ixodoidea .....                              | 5 hits  | 4 orgs [Chelicerata; Arachnida; Acari; Parasitiformes; Ixodida]  |
| ..... Ornithodoros parkeri .....                   | 1 hits  | 1 orgs [Argasidae; Ornithodorinae; Ornithodoros]                 |
| ..... Ixodidae .....                               | 4 hits  | 3 orgs                                                           |
| ..... Ixodes scapularis .....                      | 2 hits  | 1 orgs [Ixodinae; Ixodes]                                        |
| ..... Rhipicephalinae .....                        | 2 hits  | 2 orgs                                                           |
| ..... Dermacentor variabilis .....                 | 1 hits  | 1 orgs [Dermacentor]                                             |
| ..... Rhipicephalus sanguineus .....               | 1 hits  | 1 orgs [Rhipicephalus; Rhipicephalus; Rhipicephalus sanguineus]  |
| ..... Palpata .....                                | 2 hits  | 2 orgs [Annelida/Echiura/Pogonophora group; Annelida; Polychae]  |
| ..... Phragmatopoma lapidosa .....                 | 1 hits  | 1 orgs [Canalipalpata; Sabellida; Sabellariidae; Phragmatopoma]  |
| ..... Eurythoe complanata .....                    | 1 hits  | 1 orgs [Aciculata; Eunicida; Amphinomidae; Eurythoe]             |
| ..... Phoronis muelleri .....                      | 1 hits  | 1 orgs [Brachiopoda; Phoroniformea; Phoronis]                    |
| ..... Argopecten irradians .....                   | 1 hits  | 1 orgs [Mollusca; Bivalvia; Pteriomorpha; Pectinoida; Pectino]   |
| ..... Flustra foliacea .....                       | 1 hits  | 1 orgs [Bryozoa; Gymnolaemata; Cheilostomatida; Anasca; Flustr]  |
| ..... Schistosoma japonicum .....                  | 8 hits  | 1 orgs [Acoelomata; Platyhelminthes; Trematoda; Digenea; Strig]  |
| ..... Trichoplax adhaerens .....                   | 1 hits  | 1 orgs [Placozoa; Trichoplax]                                    |
| ..... Suberites domuncula .....                    | 1 hits  | 1 orgs [Porifera; Demospongiae; Tetractinomorpha; Hadromerida;]  |
| ..... Agaricales .....                             | 3 hits  | 3 orgs [Fungi; Dikarya; Basidiomycota; Agaricomycotina; Agaric]  |
| ..... Coprinopsis cinerea okayama7#130 .....       | 1 hits  | 1 orgs [Psathyrellaceae; Coprinopsis; Coprinopsis cinerea]       |
| ..... Schizophyllum commune H4-8 .....             | 1 hits  | 1 orgs [Schizophyllaceae; Schizophyllum; Schizophyllum commune]  |
| ..... Laccaria bicolor S238N-H82 .....             | 1 hits  | 1 orgs [Tricholomataceae; Laccaria; Laccaria bicolor]            |
| ..... synthetic construct .....                    | 2 hits  | 1 orgs [other sequences; artificial sequences]                   |

# BLAST

## Basic Local Alignment Search Tool

[Jump to Page Content](#)

Job Title: (2) - EZ040625

### Tax BLAST Report

#### Index

- [Lineage Report](#)
- [Organism Report](#)
- [Taxonomy Report](#)
- [Help](#)

#### Lineage Report

|                                                     |              |                              |
|-----------------------------------------------------|--------------|------------------------------|
| root                                                |              |                              |
| · Metazoa                                           | [animals]    |                              |
| · Eumetazoa                                         | [animals]    |                              |
| · Cnidaria                                          | [cnidarians] |                              |
| · Hexacorallia                                      | [anthozoans] |                              |
| · Acropora millepora                                | -----        | 1 hit [stony corals]         |
| · Nematostella vectensis                            | -----        | 1 hit [sea anemones]         |
| · Hydra magnipapillata                              | -----        | 1 hit [hydrozoans]           |
| · Eurythoe complanata                               | -----        | 1 hit [segmented worms]      |
| · Taeniopygia guttata (zebra finch)                 | -----        | 7 hits [birds]               |
| · Schistosoma mansoni                               | -----        | 1 hit [flatworms]            |
| · Strongylocentrotus purpuratus (purple urchin)     | -----        | 2 hits [sea urchins]         |
| · Tribolium castaneum (rust-red flour beetle)       | -----        | 1 hit [beetles]              |
| · Ciona intestinalis                                | -----        | 1 hit [tunicates]            |
| · Schistosoma japonicum                             | -----        | 1 hit [flatworms]            |
| · Nasonia vitripennis                               | -----        | 1 hit [wasps &c.]            |
| · Oncorhynchus masou formosanus (Taiwan salmon)     | -----        | 1 hit [bony fishes]          |
| · Gallus gallus (bantam)                            | -----        | 1 hit [birds]                |
| · Oncorhynchus mykiss                               | -----        | 1 hit [bony fishes]          |
| · Salmo salar                                       | -----        | 9 hits [bony fishes]         |
| · Anoplopoma fimbria                                | -----        | 1 hit [bony fishes]          |
| · Xenopus laevis (common platanna)                  | -----        | 2 hits [frogs & toads]       |
| · Solea senegalensis                                | -----        | 2 hits [bony fishes]         |
| · Homo sapiens (man)                                | -----        | 15 hits [primates]           |
| · Branchiostoma floridae                            | -----        | 1 hit [lancelets]            |
| · Ornithoctonus huwena (Chinese golden earth t...)  | -----        | 1 hit [spiders]              |
| · Gasterosteus aculeatus (three spined stickleback) | -----        | 1 hit [bony fishes]          |
| · Pan troglodytes                                   | -----        | 13 hits [primates]           |
| · Xenopus (Silurana) tropicalis                     | -----        | 6 hits [frogs & toads]       |
| · Bos taurus (cow)                                  | -----        | 3 hits [even-toed ungulates] |
| · Ictalurus furcatus                                | -----        | 1 hit [bony fishes]          |
| · Monodelphis domestica                             | -----        | 1 hit [marsupials]           |
| · Platicthys flesus                                 | -----        | 1 hit [bony fishes]          |
| · Sus scrofa (wild boar)                            | -----        | 2 hits [even-toed ungulates] |
| · Callithrix jacchus (common marmoset)              | -----        | 2 hits [primates]            |
| · Lycosa singoriensis                               | -----        | 1 hit [spiders]              |
| · Macaca fascicularis (cynomolgus monkey)           | -----        | 2 hits [primates]            |
| · Macaca mulatta (rhesus macaque)                   | -----        | 1 hit [primates]             |
| · Ailuropoda melanoleuca                            | -----        | 1 hit [carnivores]           |
| · Pongo abelii (Orang-utan)                         | -----        | 9 hits [primates]            |
| · Equus caballus (equine)                           | -----        | 1 hit [odd-toed ungulates]   |
| · Trichoplax adhaerens                              | -----        | 1 hit [placozoans]           |
| · Suberites domuncula                               | -----        | 1 hit [sponges]              |
| · synthetic construct                               | -----        | 4 hits [other sequences]     |

#### Organism Report

|                                                                                             |     |
|---------------------------------------------------------------------------------------------|-----|
| <a href="#">Acropora millepora</a> [stony corals] taxid 45264                               |     |
| <a href="#">gb EZ040625.1</a> TSA: Acropora millepora SeqIndex8015, mRNA ...                | 0.0 |
| <a href="#">Nematostella vectensis</a> [sea anemones] taxid 45351                           |     |
| <a href="#">ref XM_001630762.1</a> Nematostella vectensis predicted prote...                | 0.0 |
| <a href="#">Eurythoe complanata</a> [segmented worms] taxid 167815                          |     |
| <a href="#">gb EU125014.1</a> Eurythoe complanata ribosomal protein rpl13...                | 0.0 |
| <a href="#">Taeniopygia guttata</a> (zebra finch) [birds] taxid 59729                       |     |
| <a href="#">gb DQ216005.1</a> Taeniopygia guttata clone 0058P0011D10 puta...                | 0.0 |
| <a href="#">gb DQ216004.1</a> Taeniopygia guttata clone 0058P0006F05 puta...                | 0.0 |
| <a href="#">gb DQ216003.1</a> Taeniopygia guttata clone 0058P0045E08 ribo...                | 0.0 |
| <a href="#">gb DQ216000.1</a> Taeniopygia guttata clone 0058P0016A02 puta...                | 0.0 |
| <a href="#">gb DQ216006.1</a> Taeniopygia guttata clone 0061P0024G09 puta...                | 0.0 |
| <a href="#">gb DQ216002.1</a> Taeniopygia guttata clone 0058P0010A09 ribo...                | 0.0 |
| <a href="#">gb DQ216001.1</a> Taeniopygia guttata clone 0058P0049C02 puta...                | 0.0 |
| <a href="#">Trichoplax adhaerens</a> [placozoans] taxid 10228                               |     |
| <a href="#">ref XM_002112857.1</a> Trichoplax adhaerens expressed hypothe...                | 0.0 |
| <a href="#">Schistosoma mansoni</a> [flatworms] taxid 6183                                  |     |
| <a href="#">ref XM_002580005.1</a> Schistosoma mansoni 60S ribosomal prot...                | 0.0 |
| <a href="#">Suberites domuncula</a> [sponges] taxid 55567                                   |     |
| <a href="#">gb AY857427.1</a> Suberites domuncula L13a mRNA, complete cds                   | 0.0 |
| <a href="#">Strongylocentrotus purpuratus</a> (purple urchin, ...) [sea urchins] taxid 7668 |     |
| <a href="#">ref XM_001177209.1</a> PREDICTED: Strongylocentrotus purpurat...                | 0.0 |
| <a href="#">ref XM_779422.2</a> PREDICTED: Strongylocentrotus purpuratus ...                | 0.0 |
| <a href="#">Tribolium castaneum</a> (rust-red flour beetle) [beetles] taxid 7070            |     |
| <a href="#">ref XM_969211.2</a> PREDICTED: Tribolium castaneum similar to...                | 0.0 |
| <a href="#">Ciona intestinalis</a> [tunicates] taxid 7719                                   |     |
| <a href="#">dbj AK174254.1</a> Ciona intestinalis cDNA, clone:cic1013b04,...                | 0.0 |
| <a href="#">Schistosoma japonicum</a> [flatworms] taxid 6182                                |     |
| <a href="#">gb AY815942.1</a> Schistosoma japonicum SJCHGC04249 protein m...                | 0.0 |

[Nasonia vitripennis](#) [[wasps &c.](#)] [taxid 7425](#)  
[ref|XM 001607808.1|](#) PREDICTED: Nasonia vitripennis similar... 0.0

[Oncorhynchus masou formosanus](#) (Taiwan salmon) [[bony fishes](#)] [taxid 173242](#)  
[gb|EU325865.1|](#) Oncorhynchus masou formosanus ribosomal pro... 0.0

[Hydra magnipapillata](#) [[hydrozoans](#)] [taxid 6085](#)  
[ref|XM 002162001.1|](#) PREDICTED: Hydra magnipapillata simila... 0.0

[Gallus gallus](#) (bantam, ...) [[birds](#)] [taxid 9031](#)  
[emb|BX931917.1|](#) Gallus gallus finished cDNA, clone ChEST79... 0.0

[Oncorhynchus mykiss](#) [[bony fishes](#)] [taxid 8022](#)  
[gb|EZ905903.1|](#) TSA: Oncorhynchus mykiss 142569.Onmycontig ... 0.0

[Salmo salar](#) [[bony fishes](#)] [taxid 8030](#)  
[gb|BT060382.1|](#) Salmo salar clone ssal-rgH-518-022 60S ribo... 0.0  
[gb|BT060180.1|](#) Salmo salar clone ssal-rgH-507-303 60S ribo... 0.0  
[gb|BT059935.1|](#) Salmo salar clone ssal-rgg-510-349 60S ribo... 0.0  
[gb|BT058667.1|](#) Salmo salar clone Contig3117 60S ribosomal ... 0.0  
[gb|BT058473.1|](#) Salmo salar clone Contig1152 60S ribosomal ... 0.0  
[gb|BT058235.1|](#) Salmo salar clone Contig2288 60S ribosomal ... 0.0  
[gb|BT048067.1|](#) Salmo salar clone ssal-eve-575-212 60S ribo... 0.0  
[gb|BT044039.1|](#) Salmo salar clone HM6\_0617 ribosomal protei... 0.0  
[gb|BT044023.1|](#) Salmo salar clone HM6\_0789 ribosomal protei... 0.0

[Anoplopoma fimbria](#) [[bony fishes](#)] [taxid 229290](#)  
[gb|BT082277.1|](#) Anoplopoma fimbria clone afim-evh-508-275 6... 0.0

[Xenopus laevis](#) (common platanna, ...) [[frogs & toads](#)] [taxid 8355](#)  
[ref|NM 001086661.1|](#) Xenopus laevis ribosomal protein L13a ... 0.0  
[gb|BC043976.1|](#) Xenopus laevis ribosomal protein L13a, mRNA... 0.0

[Solea senegalensis](#) [[bony fishes](#)] [taxid 28829](#)  
[dbj|AB360597.1|](#) Solea senegalensis RPL13a mRNA for ribosom... 0.0  
[dbj|AB374949.1|](#) Solea senegalensis RPL13a-likel mRNA for r... 0.0

[Homo sapiens](#) (man) [[primates](#)] [taxid 9606](#)  
[gb|BC071921.1|](#) Homo sapiens cDNA clone IMAGE:6423605, \*\*\*\*... 0.0  
[gb|BC062537.1|](#) Homo sapiens ribosomal protein L13a, mRNA (... 0.0  
[dbj|AK291120.1|](#) Homo sapiens cDNA FLJ75551 complete cds, h... 0.0  
[emb|CR625138.1|](#) full-length cDNA clone CS0DI071YK05 of Pla... 0.0  
[emb|CR623949.1|](#) full-length cDNA clone CS0DE014YH06 of Pla... 0.0  
[emb|CR622930.1|](#) full-length cDNA clone CS0DE004YD03 of Pla... 0.0  
[emb|CR622697.1|](#) full-length cDNA clone CS0DL002YH12 of B c... 0.0  
[emb|CR622347.1|](#) full-length cDNA clone CS0DI069YJ19 of Pla... 0.0  
[emb|CR622131.1|](#) full-length cDNA clone CS0DI075YJ21 of Pla... 0.0  
[emb|CR620187.1|](#) full-length cDNA clone CS0DE001YC16 of Pla... 0.0  
[emb|CR619845.1|](#) full-length cDNA clone CS0DI058YC16 of Pla... 0.0  
[emb|CR618372.1|](#) full-length cDNA clone CS0DD008YF03 of Neu... 0.0  
[emb|CR618336.1|](#) full-length cDNA clone CS0DC008YA18 of Neu... 0.0  
[emb|CR618182.1|](#) full-length cDNA clone CS0DG002YE04 of B c... 0.0  
[emb|CR616905.1|](#) full-length cDNA clone CS0DI065YB06 of Pla... 0.0

[Branchiostoma floridae](#) [[lancelets](#)] [taxid 7739](#)  
[ref|XM 002590712.1|](#) Branchiostoma floridae hypothetical pr... 0.0

[Ornithoctonus huwena](#) (Chinese golden earth tiger, ...) [[spiders](#)] [taxid 29017](#)  
[gb|EU979484.1|](#) Ornithoctonus huwena clone HWE499 60S ribos... 0.0

[Gasterosteus aculeatus](#) (three spined stickleback) [[bony fishes](#)] [taxid 69293](#)  
[gb|BT026683.1|](#) Gasterosteus aculeatus clone CEC39-G07 mRNA... 0.0

[synthetic construct](#) [[other sequences](#)] [taxid 32630](#)  
[gb|EU831455.1|](#) Synthetic construct Homo sapiens clone HAIB... 0.0  
[gb|EU831542.1|](#) Synthetic construct Homo sapiens clone HAIB... 0.0  
[gb|HQ447707.1|](#) Synthetic construct Homo sapiens clone IMAG... 0.0  
[dbj|AB529025.1|](#) Synthetic construct DNA, clone: pF1KB3388,... 0.0

[Pan troglodytes](#) [[primates](#)] [taxid 9598](#)  
[ref|XM 001172807.1|](#) PREDICTED: Pan troglodytes similar to ... 0.0  
[ref|XM 001167468.1|](#) PREDICTED: Pan troglodytes similar to ... 0.0  
[ref|XM 001172844.1|](#) PREDICTED: Pan troglodytes similar to ... 0.0  
[gb|AC191221.3|](#) Pan troglodytes BAC clone CH251-653E5 from ... 0.0  
[ref|XM 001172799.1|](#) PREDICTED: Pan troglodytes similar to ... 0.0  
[ref|XM 001172778.1|](#) PREDICTED: Pan troglodytes similar to ... 0.0  
[ref|XM 001172856.1|](#) PREDICTED: Pan troglodytes similar to ... 0.0  
[ref|XM 512821.2|](#) PREDICTED: Pan troglodytes similar to rib... 0.0  
[ref|XM 001172865.1|](#) PREDICTED: Pan troglodytes similar to ... 0.0  
[ref|XM 511050.2|](#) PREDICTED: Pan troglodytes similar to 23 ... 0.0  
[ref|XM 001167494.1|](#) PREDICTED: Pan troglodytes similar to ... 0.0  
[ref|XM 001154037.1|](#) PREDICTED: Pan troglodytes similar to ... 0.0  
[ref|XM 001154104.1|](#) PREDICTED: Pan troglodytes similar to ... 0.0

[Xenopus \(Silurana\) tropicalis](#) [[frogs & toads](#)] [taxid 8364](#)  
[gb|BC168117.1|](#) Xenopus tropicalis hypothetical protein LOC... 0.0  
[gb|BC168111.1|](#) Xenopus tropicalis hypothetical protein LOC... 0.0  
[gb|BC160997.1|](#) Xenopus tropicalis hypothetical protein LOC... 0.0  
[gb|BC135476.1|](#) Xenopus tropicalis hypothetical protein LOC... 0.0  
[ref|NM 001016486.2|](#) Xenopus (Silurana) tropicalis ribosoma... 0.0  
[emb|CR760846.2|](#) Xenopus tropicalis finished cDNA, clone TT... 0.0

[Bos taurus](#) (cow, ...) [[even-toed ungulates](#)] [taxid 9913](#)  
[ref|NM 001076998.1|](#) Bos taurus ribosomal protein L13a (RPL... 0.0  
[gb|BC103039.1|](#) Bos taurus ribosomal protein L13a, mRNA (cD... 0.0  
[emb|X56933.1|](#) B.taurus mRNA, alternative polyadenylation s... 0.0

[Ictalurus furcatus](#) [[bony fishes](#)] [taxid 66913](#)  
[gb|HP440486.1|](#) TSA: Ictalurus furcatus Contig11132.Icfu mR... 0.0

[Monodelphis domestica](#) [[marsupials](#)] [taxid 13616](#)  
[ref|XM 001363184.1|](#) PREDICTED: Monodelphis domestica hypot... 0.0

[Platichthys flesus](#) [[bony fishes](#)] [taxid 8260](#)  
[emb|AJ843089.1|](#) Platichthys flesus mRNA for 60S ribosomal ... 0.0

[Sus scrofa](#) (wild boar, ...) [[even-toed ungulates](#)] [taxid 9823](#)

|                                                                                             |                                                |     |
|---------------------------------------------------------------------------------------------|------------------------------------------------|-----|
| <a href="#">ref XM_003127345.1</a>                                                          | PREDICTED: Sus scrofa bcl-2-like prote...      | 0.0 |
| <a href="#">ref XM_003127305.1</a>                                                          | PREDICTED: Sus scrofa ribosomal protei...      | 0.0 |
| <b>Callithrix jacchus</b> (common marmoset, ...) [ <a href="#">primates</a> ] taxid 9483    |                                                |     |
| <a href="#">ref XM_002762346.1</a>                                                          | PREDICTED: Callithrix jacchus 60S ribo...      | 0.0 |
| <a href="#">ref XM_002762345.1</a>                                                          | PREDICTED: Callithrix jacchus 60S ribo...      | 0.0 |
| <b>Lycosa singoriensis</b> [ <a href="#">spiders</a> ] taxid 434756                         |                                                |     |
| <a href="#">gb EU247111.1</a>                                                               | Lycosa singoriensis 60S ribosomal protein L... | 0.0 |
| <b>Macaca fascicularis</b> (cynomolgus monkey, ...) [ <a href="#">primates</a> ] taxid 9541 |                                                |     |
| <a href="#">dbj AB170257.1</a>                                                              | Macaca fascicularis brain cDNA clone: QbsB...  | 0.0 |
| <a href="#">dbj AB168305.1</a>                                                              | Macaca fascicularis testis cDNA clone: Qts...  | 0.0 |
| <b>Macaca mulatta</b> (rhesus macaque, ...) [ <a href="#">primates</a> ] taxid 9544         |                                                |     |
| <a href="#">ref NM_001195419.1</a>                                                          | Macaca mulatta ribosomal protein L13a ...      | 0.0 |
| <b>Ailuropoda melanoleuca</b> [ <a href="#">carnivores</a> ] taxid 9646                     |                                                |     |
| <a href="#">ref XM_002917840.1</a>                                                          | PREDICTED: Ailuropoda melanoleuca 60S ...      | 0.0 |
| <b>Pongo abelii</b> (Orang-utan, ...) [ <a href="#">primates</a> ] taxid 9601               |                                                |     |
| <a href="#">ref XM_002825864.1</a>                                                          | PREDICTED: Pongo abelii 60S ribosomal ...      | 0.0 |
| <a href="#">ref XM_002825863.1</a>                                                          | PREDICTED: Pongo abelii 60S ribosomal ...      | 0.0 |
| <a href="#">ref XM_002825862.1</a>                                                          | PREDICTED: Pongo abelii 60S ribosomal ...      | 0.0 |
| <a href="#">ref XM_002825861.1</a>                                                          | PREDICTED: Pongo abelii 60S ribosomal ...      | 0.0 |
| <a href="#">ref XM_002825860.1</a>                                                          | PREDICTED: Pongo abelii 60S ribosomal ...      | 0.0 |
| <a href="#">ref XM_002825859.1</a>                                                          | PREDICTED: Pongo abelii 60S ribosomal ...      | 0.0 |
| <a href="#">ref XM_002825858.1</a>                                                          | PREDICTED: Pongo abelii 60S ribosomal ...      | 0.0 |
| <a href="#">ref XM_002825857.1</a>                                                          | PREDICTED: Pongo abelii 60S ribosomal ...      | 0.0 |
| <a href="#">ref XM_002825856.1</a>                                                          | PREDICTED: Pongo abelii 60S ribosomal ...      | 0.0 |
| <b>Equus caballus</b> (equine, ...) [ <a href="#">odd-toed ungulates</a> ] taxid 9796       |                                                |     |
| <a href="#">ref XM_001491876.2</a>                                                          | PREDICTED: Equus caballus similar to r...      | 0.0 |

## Taxonomy Report

|                               |          |         |                                                                          |
|-------------------------------|----------|---------|--------------------------------------------------------------------------|
| root                          | 103 hits | 39 orgs |                                                                          |
| Metazoa                       | 99 hits  | 38 orgs | [cellular organisms; Eukaryota; Fungi/Metazoa group]                     |
| Eumetazoa                     | 97 hits  | 36 orgs |                                                                          |
| Cnidaria                      | 3 hits   | 3 orgs  |                                                                          |
| Hexacorallia                  | 2 hits   | 2 orgs  | [Anthozoa]                                                               |
| Acropora millepora            | 1 hits   | 1 orgs  | [Scleractinia; Astrocoeniina; Acroporidae; Acropora]                     |
| Nematostella vectensis        | 1 hits   | 1 orgs  | [Actiniaria; Edwardsiidae; Nematostella]                                 |
| Hydra magnipapillata          | 1 hits   | 1 orgs  | [Hydrozoa; Hydroida; Anthomedusae; Hydridae; Hydra]                      |
| Bilateria                     | 94 hits  | 33 orgs |                                                                          |
| Coelomata                     | 92 hits  | 31 orgs |                                                                          |
| Protostomia                   | 5 hits   | 5 orgs  |                                                                          |
| Eurythoe complanata           | 1 hits   | 1 orgs  | [Annelida/Echiura/Pogonophora group; Annelida; Polychaeta; Palpata; Ac]  |
| Arthropoda                    | 4 hits   | 4 orgs  | [Panarthropoda]                                                          |
| Endopterygota                 | 2 hits   | 2 orgs  | [Mandibulata; Pancrustacea; Hexapoda; Insecta; Dicondylia; Pterygota; ]  |
| Tribolium castaneum           | 1 hits   | 1 orgs  | [Coleoptera; Polyphaga; Cucujiformia; Tenebrionoidea; Tenebrionidae; T]  |
| Nasonia vitripennis           | 1 hits   | 1 orgs  | [Hymenoptera; Apocrita; Chalcidoidea group; Chalcidoidea; Pteromalidae]  |
| Araneae                       | 2 hits   | 2 orgs  | [Chelicerata; Arachnida]                                                 |
| Ornithoctonus huwena          | 1 hits   | 1 orgs  | [Mygalomorphae; Theraphosidae; Ornithoctonus]                            |
| Lycosa singoriensis           | 1 hits   | 1 orgs  | [Araneomorphae; Entelegynae; RTA clade; Lycosoidea; Lycosidae; Lycosa]   |
| Deuterostomia                 | 87 hits  | 26 orgs |                                                                          |
| Chordata                      | 85 hits  | 25 orgs |                                                                          |
| Euteleostomi                  | 83 hits  | 23 orgs | [Craniata; Vertebrata; Gnathostomata; Teleostomi]                        |
| Tetrapoda                     | 66 hits  | 15 orgs | [Sarcopterygii]                                                          |
| Amniota                       | 58 hits  | 13 orgs |                                                                          |
| Neognathae                    | 8 hits   | 2 orgs  | [Sauropsida; Sauria; Archosauria; Dinosauria; Saurischia; Theropoda; C]  |
| Taeniopygia guttata           | 7 hits   | 1 orgs  | [Passeriformes; Passeroidea; Estrildidae; Estrildinae; Taeniopygia]      |
| Gallus gallus                 | 1 hits   | 1 orgs  | [Galliformes; Phasianidae; Phasianinae; Gallus]                          |
| Theria                        | 50 hits  | 11 orgs | [Mammalia]                                                               |
| Eutheria                      | 49 hits  | 10 orgs |                                                                          |
| Simiiformes                   | 42 hits  | 6 orgs  | [Euarchontoglires; Primates; Haplorrhini]                                |
| Catarrhini                    | 40 hits  | 5 orgs  |                                                                          |
| Hominidae                     | 37 hits  | 3 orgs  | [Hominoidea]                                                             |
| Homininae                     | 28 hits  | 2 orgs  |                                                                          |
| Homo sapiens                  | 15 hits  | 1 orgs  | [Homo]                                                                   |
| Pan troglodytes               | 13 hits  | 1 orgs  | [Pan]                                                                    |
| Pongo abelii                  | 9 hits   | 1 orgs  | [Ponginae; Pongo]                                                        |
| Macaca                        | 3 hits   | 2 orgs  | [Cercopithecoidea; Cercopithecidae; Cercopithecinae]                     |
| Macaca fascicularis           | 2 hits   | 1 orgs  |                                                                          |
| Macaca mulatta                | 1 hits   | 1 orgs  |                                                                          |
| Callithrix jacchus            | 2 hits   | 1 orgs  | [Platyrrhini; Cebidae; Callitrichinae; Callitrix]                        |
| Laurasiatheria                | 7 hits   | 4 orgs  |                                                                          |
| Cetartiodactyla               | 5 hits   | 2 orgs  |                                                                          |
| Bos taurus                    | 3 hits   | 1 orgs  | [Ruminantia; Pecora; Bovidae; Bovinae; Bos]                              |
| Sus scrofa                    | 2 hits   | 1 orgs  | [Suina; Suidae; Sus]                                                     |
| Ailuropoda melanoleuca        | 1 hits   | 1 orgs  | [Carnivora; Caniformia; Ursidae; Ailuropoda]                             |
| Equus caballus                | 1 hits   | 1 orgs  | [Perissodactyla; Equidae; Equus; Equus subg. Equus]                      |
| Monodelphis domestica         | 1 hits   | 1 orgs  | [Metatheria; Didelphimorphia; Didelphidae; Didelphinae; Monodelphis]     |
| Xenopus                       | 8 hits   | 2 orgs  | [Amphibia; Batrachia; Anura; Mesobatrachia; Pipoidea; Pipidae; Xenopod]  |
| Xenopus laevis                | 2 hits   | 1 orgs  | [Xenopus]                                                                |
| Xenopus (Silurana) tropicalis | 6 hits   | 1 orgs  | [Silurana]                                                               |
| Clupecocephala                | 17 hits  | 8 orgs  | [Actinopterygii; Actinopteri; Neopterygii; Teleostei; Elopoccephala]     |
| Euteleostei                   | 16 hits  | 7 orgs  |                                                                          |
| Salmoninae                    | 11 hits  | 3 orgs  | [Actinopterygii; Salmoniformes; Salmonoidei; Salmonidae]                 |
| Oncorhynchus                  | 2 hits   | 2 orgs  |                                                                          |
| Oncorhynchus masou formosanus | 1 hits   | 1 orgs  | [Oncorhynchus masou]                                                     |
| Oncorhynchus mykiss           | 1 hits   | 1 orgs  |                                                                          |
| Salmo salar                   | 9 hits   | 1 orgs  | [Salmo]                                                                  |
| Percomorpha                   | 5 hits   | 4 orgs  | [Neognathi; Neoteleostei; Eurypterygii; Ctenosquamata; Acanthomorpha; ]  |
| Anoplopoma fimbria            | 1 hits   | 1 orgs  | [Scorpaeniformes; Anoplopomatoidei; Anoplopomatidae; Anoplopoma]         |
| Pleuronectiformes             | 3 hits   | 2 orgs  |                                                                          |
| Solea senegalensis            | 2 hits   | 1 orgs  | [Soleoidei; Soleidae; Solea]                                             |
| Platichthys flesus            | 1 hits   | 1 orgs  | [Pleuronectoidei; Pleuronectidae; Pleuronectinae; Platichthys]           |
| Gasterosteus aculeatus        | 1 hits   | 1 orgs  | [Smegeomorpha; Gasterosteiformes/Syngnathiformes group; Gasterosteifor]  |
| Ictalurus furcatus            | 1 hits   | 1 orgs  | [Otocephala; Ostariophysii; Otophysi; Siluriphysi; Siluriformes; Ictalu] |
| Ciona intestinalis            | 1 hits   | 1 orgs  | [Tunicata; Ascidiacea; Enterogona; Phlebobranchia; Cionidae; Ciona]      |
| Branchiostoma floridae        | 1 hits   | 1 orgs  | [Cephalochordata; Branchiostomidae; Branchiostoma]                       |
| Strongylocentrotus purpuratus | 2 hits   | 1 orgs  | [Echinodermata; Eleutherozoa; Echinozoa; Echinoidea; Euechinoidea; Ech]  |
| Schistosoma                   | 2 hits   | 2 orgs  | [Acoelomata; Platyhelminthes; Trematoda; Digenea; Strigeidida; Schisto]  |
| Schistosoma mansoni           | 1 hits   | 1 orgs  |                                                                          |
| Schistosoma japonicum         | 1 hits   | 1 orgs  |                                                                          |
| Trichoplax adhaerens          | 1 hits   | 1 orgs  | [Placozoa; Trichoplax]                                                   |
| Suberites domuncula           | 1 hits   | 1 orgs  | [Porifera; Demospongiae; Tetractinomorpha; Hadromerida; Suberitidae; S]  |
| synthetic construct           | 4 hits   | 1 orgs  | [other sequences; artificial sequences]                                  |

# BLAST

## Basic Local Alignment Search Tool

[Jump to Page Content](#)  
Job Title: EZ028666

### Tax BLAST Report

#### Index

- [Lineage Report](#)
- [Organism Report](#)
- [Taxonomy Report](#)
- [Help](#)

#### Lineage Report

|                                           |                |         |                       |
|-------------------------------------------|----------------|---------|-----------------------|
| root                                      |                |         |                       |
| · Metazoa                                 | [animals]      |         |                       |
| · Eumetazoa                               | [animals]      |         |                       |
| · Hexacorallia                            | [anthozoans]   |         |                       |
| · Asterozoa                               | [stony corals] |         |                       |
| · Acropora millepora                      | -----          | 1 hit   | [stony corals]        |
| · Stylophora pistillata                   | -----          | 1 hit   | [stony corals]        |
| · Nematostella vectensis                  | -----          | 1 hit   | [sea anemones]        |
| · Gallus gallus (bantam)                  | -----          | 2 hits  | [birds]               |
| · Taeniopygia guttata (zebra finch)       | -----          | 1 hit   | [birds]               |
| · Monodelphis domestica                   | -----          | 1 hit   | [marsupials]          |
| · Dermacentor variabilis                  | -----          | 2 hits  | [mites & ticks]       |
| · Solea senegalensis                      | -----          | 1 hit   | [bony fishes]         |
| · Ixodes scapularis (shoulder tick)       | -----          | 2 hits  | [mites & ticks]       |
| · Microcosmus squamiger                   | -----          | 1 hit   | [tunicates]           |
| · Hypophthalmichthys molitrix             | -----          | 1 hit   | [bony fishes]         |
| · Osmerus mordax                          | -----          | 1 hit   | [bony fishes]         |
| · Bos taurus (cow)                        | -----          | 4 hits  | [even-toed ungulates] |
| · Danio rerio (zebra fish)                | -----          | 2 hits  | [bony fishes]         |
| · Xenopus laevis (common platanna)        | -----          | 2 hits  | [frogs & toads]       |
| · Homo sapiens (man)                      | -----          | 32 hits | [primates]            |
| · Pan troglodytes                         | -----          | 1 hit   | [primates]            |
| · Pongo abelii (Orang-utan)               | -----          | 1 hit   | [primates]            |
| · Callithrix jacchus (common marmoset)    | -----          | 2 hits  | [primates]            |
| · Macaca mulatta (rhesus macaque)         | -----          | 1 hit   | [primates]            |
| · Macaca fascicularis (cynomolgus monkey) | -----          | 1 hit   | [primates]            |
| · Equus caballus (equine)                 | -----          | 2 hits  | [odd-toed ungulates]  |
| · Xenopus (Silurana) tropicalis           | -----          | 2 hits  | [frogs & toads]       |
| · Canis lupus familiaris (dogs)           | -----          | 10 hits | [carnivores]          |
| · Sus scrofa (wild boar)                  | -----          | 6 hits  | [even-toed ungulates] |
| · Ictalurus furcatus                      | -----          | 1 hit   | [bony fishes]         |
| · Rattus norvegicus (brown rat)           | -----          | 18 hits | [rodents]             |
| · Rana sylvatica                          | -----          | 1 hit   | [frogs & toads]       |
| · Trichoplax adhaerens                    | -----          | 1 hit   | [placozoans]          |
| · synthetic construct                     | -----          | 3 hits  | [other sequences]     |

#### Organism Report

|                                                                                                                                                                                                                                                                                                                                                                                                        |     |
|--------------------------------------------------------------------------------------------------------------------------------------------------------------------------------------------------------------------------------------------------------------------------------------------------------------------------------------------------------------------------------------------------------|-----|
| <a href="#">Acropora millepora</a> [stony corals] taxid 45264<br><a href="#">gb EZ028666.1</a> TSA: Acropora millepora SeqIndex5112, mRNA ...                                                                                                                                                                                                                                                          | 0.0 |
| <a href="#">Stylophora pistillata</a> [stony corals] taxid 50429<br><a href="#">gb EU069460.1</a> Stylophora pistillata 60S acidic ribosomal ...                                                                                                                                                                                                                                                       | 0.0 |
| <a href="#">Nematostella vectensis</a> [sea anemones] taxid 45351<br><a href="#">ref XM_001626244.1</a> Nematostella vectensis predicted prote...                                                                                                                                                                                                                                                      | 0.0 |
| <a href="#">Gallus gallus</a> (bantam, ...) [birds] taxid 9031<br><a href="#">ref NM_204987.1</a> Gallus gallus ribosomal protein, large, P...<br><a href="#">gb L28704.1 CHKACR1PHO</a> Chicken acidic ribosomal phosphopro...                                                                                                                                                                        | 0.0 |
| <a href="#">Taeniopygia guttata</a> (zebra finch) [birds] taxid 59729<br><a href="#">ref XM_002199525.1</a> PREDICTED: Taeniopygia guttata similar...                                                                                                                                                                                                                                                  | 0.0 |
| <a href="#">Monodelphis domestica</a> [marsupials] taxid 13616<br><a href="#">ref XM_001363500.1</a> PREDICTED: Monodelphis domestica simil...                                                                                                                                                                                                                                                         | 0.0 |
| <a href="#">Dermacentor variabilis</a> [mites & ticks] taxid 34621<br><a href="#">gb EZ525048.1</a> TSA: Dermacentor variabilis contig00110.Dvb...<br><a href="#">gb EZ532706.1</a> TSA: Dermacentor variabilis contig00067.Dvc...                                                                                                                                                                     | 0.0 |
| <a href="#">Solea senegalensis</a> [bony fishes] taxid 28829<br><a href="#">dbj AB374983.1</a> Solea senegalensis RPLP0 mRNA for ribosoma...                                                                                                                                                                                                                                                           | 0.0 |
| <a href="#">Ixodes scapularis</a> (shoulder tick, ...) [mites & ticks] taxid 6945<br><a href="#">gb DQ066213.1</a> Ixodes scapularis isolate ISUFL22 60S acidi...<br><a href="#">ref XM_002399569.1</a> Ixodes scapularis 60S acidic ribosomal...                                                                                                                                                      | 0.0 |
| <a href="#">Microcosmus squamiger</a> [tunicates] taxid 439822<br><a href="#">emb FN984781.1</a> Microcosmus squamiger mRNA for ribosomal p...                                                                                                                                                                                                                                                         | 0.0 |
| <a href="#">Hypophthalmichthys molitrix</a> [bony fishes] taxid 13095<br><a href="#">gb HM124745.1</a> Hypophthalmichthys molitrix large ribosomal...                                                                                                                                                                                                                                                  | 0.0 |
| <a href="#">Osmerus mordax</a> [bony fishes] taxid 8014<br><a href="#">gb BT074646.1</a> Osmerus mordax clone omor-rgc-511-099 60S a...                                                                                                                                                                                                                                                                | 0.0 |
| <a href="#">Bos taurus</a> (cow, ...) [even-toed ungulates] taxid 9913<br><a href="#">gb BC151695.1</a> Bos taurus ribosomal protein, large, P0, mR...<br><a href="#">gb BC102074.1</a> Bos taurus ribosomal protein, large, P0, mR...<br><a href="#">ref NM_001012682.1</a> Bos taurus ribosomal protein, large, P...<br><a href="#">gb BT021080.1</a> Bos taurus ribosomal protein, large, P0 (RP... | 0.0 |
| <a href="#">Danio rerio</a> (zebra fish, ...) [bony fishes] taxid 7955<br><a href="#">gb BC062854.1</a> Danio rerio ribosomal protein, large, P0, m...                                                                                                                                                                                                                                                 | 0.0 |



[gb|BC146738.1](#) Danio rerio ribosomal protein, large, P0, m... 0.0  
  
**Xenopus laevis** (common platanna, ...) [[frogs & toads](#)] taxid 8355  
[ref|NM\\_001086665.1](#) Xenopus laevis ribosomal protein, larg... 0.0  
[gb|BC042268.1](#) Xenopus laevis acidic ribosomal protein P0,... 0.0  
  
**Homo sapiens** (man) [[primates](#)] taxid 9606  
[gb|BC003075.1](#) Homo sapiens cDNA clone IMAGE:3506537, \*\*\*\*... 0.0  
[gb|BC071877.1](#) Homo sapiens cDNA clone IMAGE:5087581, \*\*\*\*... 0.0  
[dbj|AK001313.1](#) Homo sapiens cDNA FLJ10451 fis, clone NT2R... 0.0  
[gb|BC021049.1](#) Homo sapiens cDNA clone IMAGE:3505381, \*\*\*\*... 0.0  
[gb|BC033190.1](#) Homo sapiens ribosomal protein, large, P0, ... 0.0  
[gb|BC071911.1](#) Homo sapiens cDNA clone IMAGE:6569344, \*\*\*\*... 0.0  
[ref|NM\\_053275.3](#) Homo sapiens ribosomal protein, large, P0... 0.0  
[ref|NM\\_001002.3](#) Homo sapiens ribosomal protein, large, P0... 0.0  
[gb|BC019014.2](#) Homo sapiens ribosomal protein, large, P0, ... 0.0  
[gb|BC003655.2](#) Homo sapiens ribosomal protein, large, P0, ... 0.0  
[emb|CR625036.1](#) full-length cDNA clone CLOBB022ZB08 of Neu... 0.0  
[emb|CR597824.1](#) full-length cDNA clone CLOBA004ZA12 of Pla... 0.0  
[emb|CR619416.1](#) full-length cDNA clone CS0DH004YL14 of T c... 0.0  
[emb|CR613873.1](#) full-length cDNA clone CS0DH004YP23 of T c... 0.0  
[emb|CR625189.1](#) full-length cDNA clone CS0DF026YD05 of Fet... 0.0  
[gb|BC015690.1](#) Homo sapiens ribosomal protein, large, P0, ... 0.0  
[emb|CR600402.1](#) full-length cDNA clone CS0DN002YE06 of Adu... 0.0  
[dbj|AK129823.1](#) Homo sapiens cDNA FLJ26313 fis, clone DMC0... 0.0  
[gb|BC000087.2](#) Homo sapiens ribosomal protein, large, P0, ... 0.0  
[gb|BC001834.2](#) Homo sapiens ribosomal protein, large, P0, ... 0.0  
[gb|BC000752.2](#) Homo sapiens ribosomal protein, large, P0, ... 0.0  
[gb|M17885.1|HUMPPARP0](#) Human acidic ribosomal phosphoprotei... 0.0  
[dbj|AK129754.1](#) Homo sapiens cDNA FLJ26243 fis, clone DMC0... 0.0  
[gb|BC000345.2](#) Homo sapiens ribosomal protein, large, P0, ... 0.0  
[gb|BC005863.2](#) Homo sapiens ribosomal protein, large, P0, ... 0.0  
[gb|BC009867.2](#) Homo sapiens ribosomal protein, large, P0, ... 0.0  
[gb|BC008092.1](#) Homo sapiens ribosomal protein, large, P0, ... 0.0  
[gb|BC008594.1](#) Homo sapiens ribosomal protein, large, P0, ... 0.0  
[emb|CR602521.1](#) full-length cDNA clone CS0DA002YE14 of Neu... 0.0  
[gb|BC015173.1](#) Homo sapiens ribosomal protein, large, P0, ... 0.0  
[emb|CR599043.1](#) full-length cDNA clone CS0DH006YP10 of T c... 0.0  
[dbj|AK222468.1](#) Homo sapiens mRNA for ribosomal protein P0... 0.0  
  
**Pan troglodytes** [[primates](#)] taxid 9598  
[ref|XM\\_509423.2](#) PREDICTED: Pan troglodytes similar to 60S... 0.0  
  
**Pongo abelii** (Orang-utan, ...) [[primates](#)] taxid 9601  
[ref|XM\\_002823848.1](#) PREDICTED: Pongo abelii 60S acidic rib... 0.0  
  
**Callithrix jacchus** (common marmoset, ...) [[primates](#)] taxid 9483  
[ref|XM\\_002753072.1](#) PREDICTED: Callithrix jacchus 60S acid... 0.0  
[ref|XM\\_002753073.1](#) PREDICTED: Callithrix jacchus 60S acid... 0.0  
  
**Macaca mulatta** (rhesus macaque, ...) [[primates](#)] taxid 9544  
[ref|NM\\_001195428.1](#) Macaca mulatta ribosomal protein, larg... 0.0  
  
**Macaca fascicularis** (cynomolgus monkey, ...) [[primates](#)] taxid 9541  
[dbj|AB170149.1](#) Macaca fascicularis brain cDNA clone: QbsB... 0.0  
  
**synthetic construct** [[other sequences](#)] taxid 32630  
[gb|DQ894996.2](#) Synthetic construct Homo sapiens clone IMAG... 0.0  
[gb|DQ891813.2](#) Synthetic construct clone IMAGE:100004443; ... 0.0  
[dbj|AB464171.1](#) Synthetic construct DNA, clone: pF1KB8219,... 0.0  
  
**Equus caballus** (equine, ...) [[odd-toed ungulates](#)] taxid 9796  
[ref|XM\\_001489353.1](#) PREDICTED: Equus caballus similar to r... 0.0  
[ref|XM\\_001489330.1](#) PREDICTED: Equus caballus similar to r... 0.0  
  
**Xenopus (Silurana) tropicalis** [[frogs & toads](#)] taxid 8364  
[ref|NM\\_203736.1](#) Xenopus (Silurana) tropicalis ribosomal p... 0.0  
[gb|BC061299.1](#) Xenopus tropicalis acidic ribosomal phospho... 0.0  
  
**Canis lupus familiaris** (dogs) [[carnivores](#)] taxid 9615  
[ref|XM\\_857926.1](#) PREDICTED: Canis familiaris similar to ac... 0.0  
[ref|XM\\_857980.1](#) PREDICTED: Canis familiaris similar to ac... 0.0  
[ref|XM\\_844092.1](#) PREDICTED: Canis familiaris ribosomal pro... 0.0  
[ref|XM\\_858027.1](#) PREDICTED: Canis familiaris similar to ac... 0.0  
[ref|XM\\_858052.1](#) PREDICTED: Canis familiaris similar to ac... 0.0  
[ref|XM\\_858004.1](#) PREDICTED: Canis familiaris similar to ac... 0.0  
[ref|XM\\_535894.2](#) PREDICTED: Canis familiaris ribosomal pro... 0.0  
[ref|XM\\_853158.1](#) PREDICTED: Canis familiaris ribosomal pro... 0.0  
[ref|XM\\_853112.1](#) PREDICTED: Canis familiaris ribosomal pro... 0.0  
[ref|XM\\_845901.1](#) PREDICTED: Canis familiaris similar to ac... 0.0  
  
**Sus scrofa** (wild boar, ...) [[even-toed ungulates](#)] taxid 9823  
[dbj|AK239428.1](#) Sus scrofa mRNA, clone:THY010103A05, expre... 0.0  
[ref|NM\\_001098598.1](#) Sus scrofa ribosomal phosphoprotein la... 0.0  
[gb|DQ316319.1](#) Sus scrofa ribosomal phosphoprotein large P... 0.0  
[dbj|AK347722.1](#) Sus scrofa mRNA, clone:OVR010082B07, expre... 0.0  
[dbj|AK231505.1](#) Sus scrofa mRNA, clone:ITT010083C10, expre... 0.0  
[dbj|AK234557.1](#) Sus scrofa mRNA, clone:OVR010084G10, expre... 0.0  
  
**Ictalurus furcatus** [[bony fishes](#)] taxid 66913  
[gb|HP440171.1](#) TSA: Ictalurus furcatus Contig10804.Icfu mR... 0.0  
  
**Rattus norvegicus** (brown rat, ...) [[rodents](#)] taxid 10116  
[emb|FQ231733.1](#) Rattus norvegicus TLOAEA68YG13 mRNA sequence 0.0  
[emb|FQ231525.1](#) Rattus norvegicus TLOAEA6YC21 mRNA sequence 0.0  
[emb|FQ229397.1](#) Rattus norvegicus TLOADA48YB05 mRNA sequence 0.0  
[emb|FQ220533.1](#) Rattus norvegicus TLOADA42YI10 mRNA sequence 0.0  
[emb|FQ225860.1](#) Rattus norvegicus TLOAEA3Y011 mRNA sequence 0.0  
[emb|FQ231591.1](#) Rattus norvegicus TLOAEA68YP07 mRNA sequence 0.0  
[emb|FQ220542.1](#) Rattus norvegicus TLOADA42YH23 mRNA sequence 0.0  
[emb|FQ220527.1](#) Rattus norvegicus TLOADA42YI17 mRNA sequence 0.0  
[emb|FQ220282.1](#) Rattus norvegicus TLOADA43YH18 mRNA sequence 0.0  
[emb|FQ220008.1](#) Rattus norvegicus TLOADA44YI12 mRNA sequence 0.0  
[emb|FQ212927.1](#) Rattus norvegicus TLOAAA50YK12 mRNA sequence 0.0  
[emb|FQ229408.1](#) Rattus norvegicus TLOADA48YA13 mRNA sequence 0.0  
[emb|FQ229273.1](#) Rattus norvegicus TLOADA48YH23 mRNA sequence 0.0  
[emb|FQ228995.1](#) Rattus norvegicus TLOADA4YM19 mRNA sequence 0.0  
[emb|FQ231967.1](#) Rattus norvegicus TLOAEA67YI08 mRNA sequence 0.0

[emb|FQ224846.1](#) | Rattus norvegicus TL0ACA52YN20 mRNA sequence      0.0  
[emb|FQ227941.1](#) | Rattus norvegicus TLOAEAllyC10 mRNA sequence      0.0  
[emb|FQ233377.1](#) | Rattus norvegicus TLOAEA62YC06 mRNA sequence      0.0  
  
[Rana sylvatica](#) [[frogs & toads](#)] taxid 45438  
[gb|AF176302.1](#) | Rana sylvatica brain acidic ribosomal phosph...      0.0  
  
[Trichoplax adhaerens](#) [[placozoans](#)] taxid 10228  
[ref|XM\\_002114895.1](#) | Trichoplax adhaerens expressed hypothe...      0.0

### Taxonomy Report

|                                             |          |         |                                                                               |
|---------------------------------------------|----------|---------|-------------------------------------------------------------------------------|
| root                                        | 105 hits | 30 orgs |                                                                               |
| . Metazoa                                   | 102 hits | 29 orgs | [cellular organisms; Eukaryota; Fungi/Metazoa group]                          |
| . . Eumetazoa                               | 101 hits | 28 orgs |                                                                               |
| . . . Hexacorallia                          | 3 hits   | 3 orgs  | [Cnidaria; Anthozoa]                                                          |
| . . . . Asterozoa                           | 2 hits   | 2 orgs  | [Scleractinia]                                                                |
| . . . . Acropora millepora                  | 1 hits   | 1 orgs  | [Acroporidae; Acropora]                                                       |
| . . . . Stylophora pistillata               | 1 hits   | 1 orgs  | [Pocilloporidae; Stylophora]                                                  |
| . . . Nematostella vectensis                | 1 hits   | 1 orgs  | [Actiniaria; Edwardsiidae; Nematostella]                                      |
| . . Coelomata                               | 98 hits  | 25 orgs | [Bilateria]                                                                   |
| . . . Chordata                              | 94 hits  | 23 orgs | [Deuterostomia]                                                               |
| . . . . Euteleostomi                        | 93 hits  | 22 orgs | [Craniata; Vertebrata; Gnathostomata; Teleostomi]                             |
| . . . . Tetrapoda                           | 87 hits  | 17 orgs | [Sarcopterygii]                                                               |
| . . . . . Amniota                           | 82 hits  | 14 orgs |                                                                               |
| . . . . . Neognathae                        | 3 hits   | 2 orgs  | [Sauropsida; Sauria; Archosauria; Dinosauria; Saurischia; Theropoda; Coeluro] |
| . . . . . Gallus gallus                     | 2 hits   | 1 orgs  | [Galliformes; Phasianidae; Phasianinae; Gallus]                               |
| . . . . . Taeniopygia guttata               | 1 hits   | 1 orgs  | [Passeriformes; Passeroidea; Estrildidae; Estrildinae; Taeniopygia]           |
| . . . . Theria                              | 79 hits  | 12 orgs | [Mammalia]                                                                    |
| . . . . . Monodelphis domestica             | 1 hits   | 1 orgs  | [Metatheria; Didelphimorphia; Didelphidae; Didelphinae; Monodelphis]          |
| . . . . . Eutheria                          | 78 hits  | 11 orgs |                                                                               |
| . . . . . Laurasiatheria                    | 22 hits  | 4 orgs  |                                                                               |
| . . . . . Cetartiodactyla                   | 10 hits  | 2 orgs  |                                                                               |
| . . . . . . Bos taurus                      | 4 hits   | 1 orgs  | [Ruminantia; Pecora; Bovidae; Bovinae; Bos]                                   |
| . . . . . . Sus scrofa                      | 6 hits   | 1 orgs  | [Suina; Suidae; Sus]                                                          |
| . . . . . . Equus caballus                  | 2 hits   | 1 orgs  | [Perissodactyla; Equidae; Equus; Equus subg. Equus]                           |
| . . . . . . Canis lupus familiaris          | 10 hits  | 1 orgs  | [Carnivora; Caniformia; Canidae; Canis; Canis lupus]                          |
| . . . . . Euarchontoglires                  | 56 hits  | 7 orgs  |                                                                               |
| . . . . . . Simiiformes                     | 38 hits  | 6 orgs  | [Primates; Haplorrhini]                                                       |
| . . . . . . . Catarrhini                    | 36 hits  | 5 orgs  |                                                                               |
| . . . . . . . Hominidae                     | 34 hits  | 3 orgs  | [Hominoidea]                                                                  |
| . . . . . . . Homininae                     | 33 hits  | 2 orgs  |                                                                               |
| . . . . . . . . Homo sapiens                | 32 hits  | 1 orgs  | [Homo]                                                                        |
| . . . . . . . . Pan troglodytes             | 1 hits   | 1 orgs  | [Pan]                                                                         |
| . . . . . . . . Pongo abelii                | 1 hits   | 1 orgs  | [Ponginae; Pongo]                                                             |
| . . . . . . . Macaca                        | 2 hits   | 2 orgs  | [Cercopithecoidea; Cercopithecidae; Cercopithecinae]                          |
| . . . . . . . . Macaca mulatta              | 1 hits   | 1 orgs  |                                                                               |
| . . . . . . . . Macaca fascicularis         | 1 hits   | 1 orgs  |                                                                               |
| . . . . . . . . Callithrix jacchus          | 2 hits   | 1 orgs  | [Platyrrhini; Cebidae; Callitrichinae; Callitrix]                             |
| . . . . . . . Rattus norvegicus             | 18 hits  | 1 orgs  | [Glires; Rodentia; Sciurognathi; Muroidea; Muridae; Murinae; Rattus]          |
| . . . . . Anura                             | 5 hits   | 3 orgs  | [Amphibia; Batrachia]                                                         |
| . . . . . . Xenopus                         | 4 hits   | 2 orgs  | [Mesobatrachia; Pipoidae; Pipidae; Xenopodinae]                               |
| . . . . . . . Xenopus laevis                | 2 hits   | 1 orgs  | [Xenopus]                                                                     |
| . . . . . . . Xenopus (Silurana) tropicalis | 2 hits   | 1 orgs  | [Silurana]                                                                    |
| . . . . . . Rana sylvatica                  | 1 hits   | 1 orgs  | [Neobatrachia; Ranoidea; Ranidae; Raninae; Rana; Novirana; Aquarana/sylvatic] |
| . . . . . Clupecocephala                    | 6 hits   | 5 orgs  | [Actinopterygii; Actinopteri; Neopterygii; Teleostei; Elopococephala]         |
| . . . . . . Euteleostei                     | 2 hits   | 2 orgs  |                                                                               |
| . . . . . . . Solea senegalensis            | 1 hits   | 1 orgs  | [Neognathi; Neoteleostei; Eurypterygii; Ctenosquamata; Acanthomorpha; Euacan] |
| . . . . . . . Osmerus mordax                | 1 hits   | 1 orgs  | [Protacanthopterygii; Osmeriformes; Osmeroidi; Osmeroidea; Osmeridae; Osmer]  |
| . . . . . . . Otophysi                      | 4 hits   | 3 orgs  | [Otocephala; Ostariophysi]                                                    |
| . . . . . . . Cyprinidae                    | 3 hits   | 2 orgs  | [Cypriniphysi; Cypriniformes; Cyprinoidea]                                    |
| . . . . . . . Hypophthalmichthys molitrix   | 1 hits   | 1 orgs  | [Hypophthalmichthys]                                                          |
| . . . . . . . Danio rerio                   | 2 hits   | 1 orgs  | [Danio]                                                                       |
| . . . . . . . Ictalurus furcatus            | 1 hits   | 1 orgs  | [Siluriphysi; Siluriformes; Ictaluridae; Ictalurus]                           |
| . . . . . . . Microcosmus squamiger         | 1 hits   | 1 orgs  | [Tunicata; Ascidiacea; Stolidobranchia; Pyuridae; Microcosmus]                |
| . . . . . . . Ixodidae                      | 4 hits   | 2 orgs  | [Protostomia; Panarthropoda; Arthropoda; Chelicerata; Arachnida; Acari; Para] |
| . . . . . . . Dermacentor variabilis        | 2 hits   | 1 orgs  | [Rhipicephalinae; Dermacentor]                                                |
| . . . . . . . Ixodes scapularis             | 2 hits   | 1 orgs  | [Ixodinae; Ixodes]                                                            |
| . . . . . Trichoplax adhaerens              | 1 hits   | 1 orgs  | [Placozoa; Trichoplax]                                                        |
| . . . synthetic construct                   | 3 hits   | 1 orgs  | [other sequences; artificial sequences]                                       |

# BLAST

## Basic Local Alignment Search Tool

[Jump to Page Content](#)

Job Title: EZ011917

### Tax BLAST Report

#### Index

- [Lineage Report](#)
- [Organism Report](#)
- [Taxonomy Report](#)
- [Help](#)

#### Lineage Report

| root                                                   |              |                              |
|--------------------------------------------------------|--------------|------------------------------|
| • Eumetazoa                                            | [animals]    |                              |
| • Cnidaria                                             | [cnidarians] |                              |
| • Hexacorallia                                         | [anthozoans] |                              |
| • Acropora millepora                                   | -----        | 6 hits [stony corals]        |
| • Nematostella vectensis                               | -----        | 1 hit [sea anemones]         |
| • Hydra magnipapillata                                 | -----        | 2 hits [hydrozoans]          |
| • Hydra vulgaris                                       | -----        | 1 hit [hydrozoans]           |
| • Saccoglossus kowalevskii                             | -----        | 1 hit [hemichordates]        |
| • Xenopus (Silurana) tropicalis                        | -----        | 2 hits [frogs & toads]       |
| • Xenopus laevis (common platanna)                     | -----        | 4 hits [frogs & toads]       |
| • Oryctolagus cuniculus (domestic rabbit)              | -----        | 1 hit [rabbits & hares]      |
| • Odontesthes bonariensis                              | -----        | 1 hit [bony fishes]          |
| • Canis lupus familiaris (dogs)                        | -----        | 5 hits [carnivores]          |
| • Sus scrofa (wild boar)                               | -----        | 2 hits [even-toed ungulates] |
| • Homo sapiens (man)                                   | -----        | 13 hits [primates]           |
| • Danio rerio (zebra fish)                             | -----        | 7 hits [bony fishes]         |
| • Pongo abelii (Orang-utan)                            | -----        | 2 hits [primates]            |
| • Callithrix jacchus (common marmoset)                 | -----        | 3 hits [primates]            |
| • Bos taurus (cow)                                     | -----        | 7 hits [even-toed ungulates] |
| • Equus caballus (equine)                              | -----        | 1 hit [odd-toed ungulates]   |
| • Ailuropoda melanoleuca                               | -----        | 1 hit [carnivores]           |
| • Felis catus (cat)                                    | -----        | 1 hit [carnivores]           |
| • Gobio gobio                                          | -----        | 1 hit [bony fishes]          |
| • Monodelphis domestica                                | -----        | 4 hits [marsupials]          |
| • Rattus norvegicus (brown rat)                        | -----        | 7 hits [rodents]             |
| • Mus musculus (mouse)                                 | -----        | 14 hits [rodents]            |
| • Macaca mulatta (rhesus macaque)                      | -----        | 6 hits [primates]            |
| • Ornithorhynchus anatinus (duck-billed platypus)      | -----        | 1 hit [monotremes]           |
| • Gadus morhua                                         | -----        | 1 hit [bony fishes]          |
| • Lonchura striata (white-backed munia)                | -----        | 2 hits [birds]               |
| • Cricetulus longicaudatus (lesser long-tailed ham...) | -----        | 2 hits [rodents]             |
| • Taeniopygia guttata (zebra finch)                    | -----        | 1 hit [birds]                |
| • Gallus gallus (bantam)                               | -----        | 2 hits [birds]               |
| • Pan troglodytes                                      | -----        | 1 hit [primates]             |
| • Macaca fascicularis (cynomolgus monkey)              | -----        | 1 hit [primates]             |
| • synthetic construct                                  | -----        | 7 hits [other sequences]     |

#### Organism Report

|                                                                                           |     |
|-------------------------------------------------------------------------------------------|-----|
| <a href="#">Acropora millepora</a> [stony corals] taxid 45264                             |     |
| <a href="#">gb EZ011917.1</a> TSA: Acropora millepora SeqIndex13789, mRNA...              | 0.0 |
| <a href="#">gb EU161957.1</a> Acropora millepora Bcl-like protein mRNA, c...              | 0.0 |
| <a href="#">gb EZ004016.1</a> TSA: Acropora millepora SeqIndex13791, mRNA...              | 0.0 |
| <a href="#">gb EZ004015.1</a> TSA: Acropora millepora SeqIndex13790, mRNA...              | 0.0 |
| <a href="#">gb EU161958.1</a> Acropora millepora Bax-like protein mRNA, c...              | 0.0 |
| <a href="#">gb EZ011916.1</a> TSA: Acropora millepora SeqIndex13788, mRNA...              | 0.0 |
| <a href="#">Nematostella vectensis</a> [sea anemones] taxid 45351                         |     |
| <a href="#">ref XM 001634647.1</a> Nematostella vectensis predicted prote...              | 0.0 |
| <a href="#">Hydra magnipapillata</a> [hydrozoans] taxid 6085                              |     |
| <a href="#">ref XM 002167542.1</a> PREDICTED: Hydra magnipapillata simila...              | 0.0 |
| <a href="#">ref XM 002158467.1</a> PREDICTED: Hydra magnipapillata simila...              | 0.0 |
| <a href="#">Hydra vulgaris</a> [hydrozoans] taxid 6087                                    |     |
| <a href="#">gb EU035764.1</a> Hydra vulgaris bcl-2-like 4 mRNA, complete cds              | 0.0 |
| <a href="#">Saccoglossus kowalevskii</a> [hemichordates] taxid 10224                      |     |
| <a href="#">ref XM 002740743.1</a> PREDICTED: Saccoglossus kowalevskii pr...              | 0.0 |
| <a href="#">Xenopus (Silurana) tropicalis</a> [frogs & toads] taxid 8364                  |     |
| <a href="#">ref NM 001011065.1</a> Xenopus (Silurana) tropicalis BCL2-lik...              | 0.0 |
| <a href="#">gb BC084445.1</a> Xenopus tropicalis Bcl2-like 2, mRNA (cDNA ...              | 0.0 |
| <a href="#">Xenopus laevis</a> (common platanna, ...) [frogs & toads] taxid 8355          |     |
| <a href="#">ref NM 001092260.1</a> Xenopus laevis BCL2-like 2 (bcl2l2-a),...              | 0.0 |
| <a href="#">gb BC073259.1</a> Xenopus laevis MGC80617 protein, mRNA (cDNA...              | 0.0 |
| <a href="#">ref NM 001088104.1</a> Xenopus laevis BCL2-like 2 (bcl2l2-b),...              | 0.0 |
| <a href="#">emb X82462.1</a> X.laevis R1 mRNA                                             | 0.0 |
| <a href="#">Oryctolagus cuniculus</a> (domestic rabbit, ...) [rabbits & hares] taxid 9986 |     |
| <a href="#">ref XM 002717903.1</a> PREDICTED: Oryctolagus cuniculus BCL-W...              | 0.0 |
| <a href="#">Odontesthes bonariensis</a> [bony fishes] taxid 219752                        |     |
| <a href="#">gb FJ868843.1</a> Odontesthes bonariensis bcl2 mRNA, complete...              | 0.0 |
| <a href="#">Canis lupus familiaris</a> (dogs) [carnivores] taxid 9615                     |     |
| <a href="#">ref XM 853671.1</a> PREDICTED: Canis familiaris BCL2-like 2, ...              | 0.0 |
| <a href="#">ref XM 853783.1</a> PREDICTED: Canis familiaris BCL2-like 2, ...              | 0.0 |
| <a href="#">ref NM 001031635.2</a> Canis lupus familiaris poly(A) binding...              | 0.0 |
| <a href="#">gb D0116955.1</a> Canis familiaris Bcl-w protein (BCL2L2) mRN...              | 0.0 |
| <a href="#">gb AY509563.1</a> Canis familiaris Bcl-2 mRNA, complete cds                   | 0.0 |
| <a href="#">Sus scrofa</a> (wild boar, ...) [even-toed ungulates] taxid 9823              |     |
| <a href="#">dbj AK349051.1</a> Sus scrofa mRNA, clone:PCT010006D06, expre...              | 0.0 |

ref|XM 001928880.2| PREDICTED: Sus scrofa bcl-2-like prote... 0.0

**Homo sapiens** (man) [[primates](#)] taxid 9606

gb|BC011637.1| Homo sapiens mRNA similar to BCL2-like 2 (c... 0.0

ref|NM 004050.3| Homo sapiens BCL2-like 2 (BCL2L2), mRNA 0.0

dbj|D87461.1| Homo sapiens mRNA for KIAA0271 gene, partial... 0.0

gb|BC113522.1| Homo sapiens BCL2-like 2, mRNA (cDNA clone ... 0.0

gb|BC104789.1| Homo sapiens BCL2-like 2, mRNA (cDNA clone ... 0.0

gb|BC021198.2| Homo sapiens BCL2-like 2, mRNA (cDNA clone ... 0.0

dbj|AK289519.1| Homo sapiens cDNA FLJ75568 complete cds, h... 0.0

gb|BT019549.1| Homo sapiens BCL2-like 2 mRNA, complete cds 0.0

gb|U59747.1|HSU59747 Human Bcl-w (bcl-w) mRNA, complete cds 0.0

emb|AL049829.4| Human chromosome 14 DNA sequence BAC R-124... 0.0

gb|AY927500.1| Homo sapiens mRNA sequence 0.0

ref|NM 138578.1| Homo sapiens BCL2-like 1 (BCL2L1), nuclea... 0.0

gb|BC019307.1| Homo sapiens BCL2-like 1, mRNA (cDNA clone ... 0.0

**Danio rerio** (zebra fish, ...) [[bony fishes](#)] taxid 7955

gb|DQ022560.1| Danio rerio Bcl-XL-like protein 1 (blpl) mR... 0.0

gb|BC071291.1| Danio rerio bcl2-like, mRNA (cDNA clone MGC... 0.0

ref|NM 131807.1| Danio rerio bcl2-like 1 (bcl2l1), nuclear... 0.0

gb|AF317837.1|AF317837 Danio rerio Bcl-XL-like protein 1 (... 0.0

gb|BC044130.1| Danio rerio bcl2-like, mRNA (cDNA clone MGC... 0.0

gb|BC165156.1| Danio rerio bcl2-like, mRNA (cDNA clone MGC... 0.0

ref|XM 001341178.2| PREDICTED: Danio rerio Bcl2-like (LOC1... 0.0

**Pongo abelii** (Orang-utan, ...) [[primates](#)] taxid 9601

ref|XM 002824582.1| PREDICTED: Pongo abelii bcl-2-like pro... 0.0

ref|XM 002824583.1| PREDICTED: Pongo abelii bcl-2-like pro... 0.0

**Callithrix jacchus** (common marmoset, ...) [[primates](#)] taxid 9483

ref|XM 002753638.1| PREDICTED: Callithrix jacchus bcl-2-li... 0.0

ref|XM 002747332.1| PREDICTED: Callithrix jacchus bcl-2-li... 0.0

ref|XM 002747333.1| PREDICTED: Callithrix jacchus bcl-2-li... 0.0

**Bos taurus** (cow, ...) [[even-toed ungulates](#)] taxid 9913

ref|NM 001076533.1| Bos taurus BCL2-like 2 (BCL2L2), mRNA 0.0

gb|BC114652.1| Bos taurus BCL2-like 2, mRNA (cDNA clone MG... 0.0

dbj|AB238938.1| Bos taurus BCL2L2 mRNA for BCL2-like 2, co... 0.0

gb|DQ001758.1| Bos taurus BCL2-like protein 2 (BCL2L2) gen... 0.0

gb|BC147863.1| Bos taurus BCL2-like 1, mRNA (cDNA clone MG... 0.0

ref|NM 001077486.2| Bos taurus BCL2-like 1 (BCL2L1), nucle... 0.0

gb|BC133281.1| Bos taurus BCL2-like 1, mRNA (cDNA clone MG... 0.0

**Equus caballus** (equine, ...) [[odd-toed ungulates](#)] taxid 9796

ref|XM 001493694.2| PREDICTED: Equus caballus similar to A... 0.0

**Ailuropoda melanoleuca** [[carnivores](#)] taxid 9646

ref|XM 002926013.1| PREDICTED: Ailuropoda melanoleuca bcl-... 0.0

**Felis catus** (cat, ...) [[carnivores](#)] taxid 9685

gb|DQ926874.1| Felis catus BCL2L2 (BCL2L2) mRNA, partial cds 0.0

**synthetic construct** [[other sequences](#)] taxid 32630

dbj|AB383828.1| Synthetic construct DNA, clone: pFKSDA027... 0.0

gb|BT019548.1| Synthetic construct Homo sapiens BCL2-like ... 0.0

gb|AY890819.1| Synthetic construct Homo sapiens clone FLH0... 0.0

gb|AY890433.1| Synthetic construct Homo sapiens clone FLH1... 0.0

gb|AY888229.1| Synthetic construct Homo sapiens clone FLH0... 0.0

gb|AY892894.1| Synthetic construct Homo sapiens clone FLH1... 0.0

gb|AY888228.1| Synthetic construct Homo sapiens clone FLH0... 0.0

**Gobio gobio** [[bony fishes](#)] taxid 27704

gb|FJ612582.1| Gobio gobio bcl-2 protein mRNA, partial cds 0.0

**Monodelphis domestica** [[marsupials](#)] taxid 13616

ref|XM 001369257.1| PREDICTED: Monodelphis domestica simil... 0.0

ref|XM 001365223.1| PREDICTED: Monodelphis domestica simil... 0.0

ref|XM 001365293.1| PREDICTED: Monodelphis domestica simil... 0.0

ref|XM 001362813.1| PREDICTED: Monodelphis domestica simil... 0.0

**Rattus norvegicus** (brown rat, ...) [[rodents](#)] taxid 10116

emb|FQ212018.1| Rattus norvegicus TL0AA72YG18 mRNA sequence 0.0

ref|NM 021850.2| Rattus norvegicus Bcl2-like 2 (Bcl2l2), mRNA 0.0

gb|BC074021.1| Rattus norvegicus Bcl2-like 2, mRNA (cDNA c... 0.0

gb|AY185098.1| Rattus norvegicus BCL-W mRNA, complete cds 0.0

gb|AY185100.1| Rattus norvegicus BCL-WEL mRNA, complete cds 0.0

gb|AF096291.1|AF096291 Rattus norvegicus Bcl-w (bcl-w) mRN... 0.0

gb|AF512835.1| Rattus norvegicus Bcl2-like protein mRNA, c... 0.0

**Mus musculus** (mouse) [[rodents](#)] taxid 10090

dbj|AK004680.1| Mus musculus adult male lung cDNA, RIKEN f... 0.0

ref|NM 007537.1| Mus musculus BCL2-like 2 (Bcl2l2), mRNA 0.0

gb|AF030769.1|AF030769 Mus musculus BCL-W (Bcl-w) mRNA, co... 0.0

dbj|AK172925.1| Mus musculus mRNA for mKIAA0271 protein 0.0

dbj|AK015644.1| Mus musculus adult male testis cDNA, RIKEN... 0.0

gb|U59746.1|MMU59746 Mus musculus Bcl-w (bcl-w) mRNA, comp... 0.0

gb|AC116591.4| Mus musculus BAC clone RP24-90K1 from chrom... 0.0

emb|CT025533.11| Mouse DNA sequence from clone RP23-93K3 o... 0.0

gb|BC040369.1| Mus musculus BCL2-like 2, mRNA (cDNA clone ... 0.0

dbj|AK013244.1| Mus musculus 10, 11 days embryo whole body... 0.0

ref|NM 009741.3| Mus musculus B-cell leukemia/lymphoma 2 (... 0.0

gb|BC095964.1| Mus musculus B-cell leukemia/lymphoma 2, mR... 0.0

dbj|AK049473.1| Mus musculus 7 days embryo whole body cDNA... 0.0

dbj|AK172250.1| Mus musculus activated spleen cDNA, RIKEN ... 0.0

**Macaca mulatta** (rhesus macaque, ...) [[primates](#)] taxid 9544

ref|XM 001107287.2| PREDICTED: Macaca mulatta polyadenylat... 0.0

ref|XM 001110326.1| PREDICTED: Macaca mulatta bcl-2-like p... 0.0

ref|XM 001110285.1| PREDICTED: Macaca mulatta bcl-2-like p... 0.0

ref|XM 001110113.2| PREDICTED: Macaca mulatta bcl-2-like p... 0.0

ref|XM 001110205.2| PREDICTED: Macaca mulatta bcl-2-like p... 0.0

ref|XM 001110062.2| PREDICTED: Macaca mulatta bcl-2-like p... 0.0

**Ornithorhynchus anatinus** (duck-billed platypus, ...) [[monotremes](#)] taxid 9258

ref|XM 001512417.1| PREDICTED: Ornithorhynchus anatinus si... 0.0

**Gadus morhua** [[bony fishes](#)] taxid 8049

[gb|GQ387053.1](#) Gadus morhua Bcl-X2 (Bcl-X2) mRNA, partial cds 0.0  
[Lonchura striata](#) (white-backed munia) [[birds](#)] taxid 40157  
[gb|DQ017953.1](#) Lonchura striata Bcl-xL (Bcl-xL) mRNA, comp... 0.0  
[Cricetulus longicaudatus](#) (lesser long-tailed hamster, ...) [[rodents](#)] taxid 10030  
[emb|AJ271720.1](#) Cricetulus longicaudatus mRNA for B-cell l... 0.0  
[gb|AF404339.1|AF404339](#) Cricetulus longicaudatus B-cell lym... 0.0  
[Taeniopygia guttata](#) (zebra finch) [[birds](#)] taxid 59729  
[ref|XM\\_002193086.1](#) PREDICTED: Taeniopygia guttata BCL2-li... 0.0  
[Gallus gallus](#) (bantam, ...) [[birds](#)] taxid 9031  
[ref|NM\\_001025304.1](#) Gallus gallus BCL2-like 1 (BCL2L1), nu... 0.0  
[gb|U26645.1|GGU26645](#) Gallus gallus bcl-x (bcl-x) mRNA, com... 0.0  
[Pan troglodytes](#) [[primates](#)] taxid 9598  
[ref|XM\\_514565.2](#) PREDICTED: Pan troglodytes BCL2-like 1, t... 0.0  
[Macaca fascicularis](#) (cynomolgus monkey, ...) [[primates](#)] taxid 9541  
[dbj|AB220511.1](#) Macaca fascicularis mRNA, clone QnpA-16956... 0.0

## Taxonomy Report

```

root ..... 110 hits 33 orgs
. Eumetazoa ..... 103 hits 32 orgs [cellular organisms; Eukaryota; Fungi/Metazoa group; Metazoa]
. . Cnidaria ..... 10 hits 4 orgs
. . . Hexacorallia ..... 7 hits 2 orgs [Anthozoa]
. . . . Acropora millepora ..... 6 hits 1 orgs [Scleractinia; Astrocoeniina; Acroporidae; Acropora]
. . . . Nematostella vectensis ..... 1 hits 1 orgs [Actiniaria; Edwardsiidae; Nematostella]
. . . Hydra ..... 3 hits 2 orgs [Hydrozoa; Hydroida; Anthomedusae; Hydridae]
. . . . Hydra magnipapillata ..... 2 hits 1 orgs
. . . . Hydra vulgaris ..... 1 hits 1 orgs
. Deuterostomia ..... 93 hits 28 orgs [Bilateria; Coelomata]
. . Saccoglossus kowalevskii ..... 1 hits 1 orgs [Hemichordata; Enteropneusta; Harrimaniidae; Saccoglossus]
. . . Euteleostomi ..... 92 hits 27 orgs [Chordata; Craniata; Vertebrata; Gnathostomata; Teleostomi]
. . . . Tetrapoda ..... 82 hits 23 orgs [Sarcopterygii]
. . . . . Xenopus ..... 6 hits 2 orgs [Amphibia; Batrachia; Anura; Mesobatrachia; Pipoidea; Pipidae; Xenopodinae]
. . . . . Xenopus (Silurana) tropicalis ..... 2 hits 1 orgs [Silurana]
. . . . . Xenopus laevis ..... 4 hits 1 orgs [Xenopus]
. . . . Amniota ..... 76 hits 21 orgs
. . . . . Mammalia ..... 72 hits 18 orgs
. . . . . . Theria ..... 71 hits 17 orgs
. . . . . . . Eutheria ..... 67 hits 16 orgs
. . . . . . . . Euarchontoglires ..... 50 hits 10 orgs
. . . . . . . . . Glires ..... 24 hits 4 orgs
. . . . . . . . . . Oryctolagus cuniculus ..... 1 hits 1 orgs [Lagomorpha; Leporidae; Oryctolagus]
. . . . . . . . . . Muroidea ..... 23 hits 3 orgs [Rodentia; Sciurognathi]
. . . . . . . . . . . Murinae ..... 21 hits 2 orgs [Muridae]
. . . . . . . . . . . . Rattus norvegicus ..... 7 hits 1 orgs [Rattus]
. . . . . . . . . . . . Mus musculus ..... 14 hits 1 orgs [Mus; Mus]
. . . . . . . . . . . . Cricetulus longicaudatus ..... 2 hits 1 orgs [Cricetidae; Cricetinae; Cricetulus]
. . . . . . . . . . . . . Smitiiformes ..... 26 hits 6 orgs [Primates; Haplorrhini]
. . . . . . . . . . . . . . Catarhini ..... 23 hits 5 orgs
. . . . . . . . . . . . . . . Hominidae ..... 16 hits 3 orgs [Hominoidea]
. . . . . . . . . . . . . . . . Homininae ..... 14 hits 2 orgs
. . . . . . . . . . . . . . . . . Homo sapiens ..... 13 hits 1 orgs [Homo]
. . . . . . . . . . . . . . . . . . Pan troglodytes ..... 1 hits 1 orgs [Pan]
. . . . . . . . . . . . . . . . . . . Pongo abelii ..... 2 hits 1 orgs [Ponginae; Pongo]
. . . . . . . . . . . . . . . . . . . . Macaca ..... 7 hits 2 orgs [Cercopithecoidea; Cercopithecidae; Cercopithecinae]
. . . . . . . . . . . . . . . . . . . . . Macaca mulatta ..... 6 hits 1 orgs
. . . . . . . . . . . . . . . . . . . . . . Macaca fascicularis ..... 1 hits 1 orgs
. . . . . . . . . . . . . . . . . . . . . . Callithrix jacchus ..... 3 hits 1 orgs [Platyrrhini; Cebidae; Callitrichinae; Callithrix]
. . . . . . . . . . . . . . . . . . . . . . . Laurasiatheria ..... 17 hits 6 orgs
. . . . . . . . . . . . . . . . . . . . . . . . Carnivora ..... 7 hits 3 orgs
. . . . . . . . . . . . . . . . . . . . . . . . . Caniformia ..... 6 hits 2 orgs
. . . . . . . . . . . . . . . . . . . . . . . . . . Canis lupus familiaris ..... 5 hits 1 orgs [Canidae; Canis; Canis lupus]
. . . . . . . . . . . . . . . . . . . . . . . . . . . Ailuropoda melanoleuca ..... 1 hits 1 orgs [Ursidae; Ailuropoda]
. . . . . . . . . . . . . . . . . . . . . . . . . . . . Felis catus ..... 1 hits 1 orgs [Feliformia; Felidae; Felinae; Felis]
. . . . . . . . . . . . . . . . . . . . . . . . . . . . . Cetartiodactyla ..... 9 hits 2 orgs
. . . . . . . . . . . . . . . . . . . . . . . . . . . . . . Sus scrofa ..... 2 hits 1 orgs [Suina; Suidae; Sus]
. . . . . . . . . . . . . . . . . . . . . . . . . . . . . . . Bos taurus ..... 7 hits 1 orgs [Ruminantia; Pecora; Bovidae; Bovinae; Bos]
. . . . . . . . . . . . . . . . . . . . . . . . . . . . . . . . Equus caballus ..... 1 hits 1 orgs [Perissodactyla; Equidae; Equus; Equus subg. Equus]
. . . . . . . . . . . . . . . . . . . . . . . . . . . . . . . . . Monodelphis domestica ..... 4 hits 1 orgs [Metatheria; Didelphimorphia; Didelphidae; Didelphinae; Monodelphis]
. . . . . . . . . . . . . . . . . . . . . . . . . . . . . . . . . . Ornithorhynchus anatinus ..... 1 hits 1 orgs [Prototheria; Monotremata; Ornithorhynchidae; Ornithorhynchus]
. . . . . . . . . . . . . . . . . . . . . . . . . . . . . . . . . . . Neognathae ..... 4 hits 3 orgs [Sauropsida; Sauria; Archosauria; Dinosauria; Theropoda; Coelur]
. . . . . . . . . . . . . . . . . . . . . . . . . . . . . . . . . . . . Estrildinae ..... 2 hits 2 orgs [Passeriformes; Passeroidea; Estrildidae]
. . . . . . . . . . . . . . . . . . . . . . . . . . . . . . . . . . . . Lonchura striata ..... 1 hits 1 orgs [Lonchura]
. . . . . . . . . . . . . . . . . . . . . . . . . . . . . . . . . . . . Taeniopygia guttata ..... 1 hits 1 orgs [Taeniopygia]
. . . . . . . . . . . . . . . . . . . . . . . . . . . . . . . . . . . . . Gallus gallus ..... 2 hits 1 orgs [Galliformes; Phasianidae; Phasianinae; Gallus]
. . . . . . . . . . . . . . . . . . . . . . . . . . . . . . . . . . . . . . Clupeocephala ..... 10 hits 4 orgs [Actinopterygii; Actinopteri; Neopterygii; Teleostei; Elopoecephala]
. . . . . . . . . . . . . . . . . . . . . . . . . . . . . . . . . . . . . . . Holacanthopterygii ..... 2 hits 2 orgs [Euteleostei; Neognathi; Neoteleostei; Eurypterygii; Ctenosquamata; Acantho]
. . . . . . . . . . . . . . . . . . . . . . . . . . . . . . . . . . . . . . . . Odontesthes bonariensis ..... 1 hits 1 orgs [Acanthopterygii; Euacanthopterygii; Percomorpha; Smegmamorpha; Atherinomor]
. . . . . . . . . . . . . . . . . . . . . . . . . . . . . . . . . . . . . . . . . Gadus morhua ..... 1 hits 1 orgs [Paracanthopterygii; Gadiformes; Gadidae; Gadus]
. . . . . . . . . . . . . . . . . . . . . . . . . . . . . . . . . . . . . . . . . . Cyprinidae ..... 8 hits 2 orgs [Otocephala; Ostariophysi; Otophysi; Cypriniphysi; Cypriniformes; Cyprinoid]
. . . . . . . . . . . . . . . . . . . . . . . . . . . . . . . . . . . . . . . . . . . Danio rerio ..... 7 hits 1 orgs [Danio]
. . . . . . . . . . . . . . . . . . . . . . . . . . . . . . . . . . . . . . . . . . . . Gobio gobio ..... 1 hits 1 orgs [Gobio]
. synthetic construct ..... 7 hits 1 orgs [other sequences; artificial sequences]
  
```

# BLAST

## Basic Local Alignment Search Tool

[Jump to Page Content](#)

Job Title: (2) - EZ037140

•

### Tax BLAST Report

#### Index

- [Lineage Report](#)
- [Organism Report](#)
- [Taxonomy Report](#)
- [Help](#)

#### Lineage Report

|                                                 |              |                                                                                        |
|-------------------------------------------------|--------------|----------------------------------------------------------------------------------------|
| root                                            |              |                                                                                        |
| • Metazoa                                       | [animals]    |                                                                                        |
| • Eumetazoa                                     | [animals]    |                                                                                        |
| • Cnidaria                                      | [cnidarians] |                                                                                        |
| • Hexacorallia                                  | [anthozoans] |                                                                                        |
| • Acropora millepora                            | -----        | 1 hit [stony corals] TSA: Acropora millepora SeqIndex7167, mRNA sequence               |
| • Nematostella vectensis                        | -----        | 1 hit [sea anemones] Nematostella vectensis predicted protein (NEMVEDRAFT_v1g1         |
| • Hydra magnipapillata                          | -----        | 2 hits [hydrozoans] PREDICTED: Hydra magnipapillata similar to bak (LOC100208          |
| • Hydra vulgaris                                | -----        | 2 hits [hydrozoans] Hydra vulgaris bak mRNA, complete cds                              |
| • Branchiostoma floridae                        | -----        | 1 hit [lancelets] Branchiostoma floridae hypothetical protein, mRNA                    |
| • Strongylocentrotus purpuratus (purple urchin) | -----        | 2 hits [sea urchins] PREDICTED: Strongylocentrotus purpuratus similar to Bak p         |
| • Monodelphis domestica                         | -----        | 1 hit [marsupials] PREDICTED: Monodelphis domestica similar to Bcl-2 antagon           |
| • Gallus gallus (bantam)                        | -----        | 3 hits [birds] Gallus gallus BCL2-antagonist/killer 1 (BAK1), mRNA >gi6                |
| • Ailuropoda melanoleuca                        | -----        | 2 hits [carnivores] PREDICTED: Ailuropoda melanoleuca bcl-2 homologous antago          |
| • Callithrix jacchus (common marmoset)          | -----        | 4 hits [primates] PREDICTED: Callithrix jacchus bcl-2 homologous antagonist            |
| • Canis lupus familiaris (dogs)                 | -----        | 2 hits [carnivores] Canis lupus familiaris BCL2-antagonist/killer 1 (BAK1), m          |
| • Oryctolagus cuniculus (domestic rabbit)       | -----        | 1 hit [rabbits & hares] PREDICTED: Oryctolagus cuniculus BCL2-antagonist/killer 1      |
| • Ovis aries (domestic sheep)                   | -----        | 1 hit [even-toed ungulates] Ovis aries Bak protein mRNA, partial cds                   |
| • Homo sapiens (man)                            | -----        | 22 hits [primates] Homo sapiens BCL2-antagonist/killer 1 (BAK1), mRNA                  |
| • Pan troglodytes                               | -----        | 4 hits [primates] PREDICTED: Pan troglodytes BCL2-antagonist/killer 1, tran            |
| • Macaca mulatta (rhesus macaque)               | -----        | 8 hits [primates] PREDICTED: Macaca mulatta BCL2-antagonist/killer 1, trans            |
| • Bos taurus (cow)                              | -----        | 9 hits [even-toed ungulates] Bos taurus BCL2-antagonist/killer 1 (BAK1), mRNA, complet |
| • Sus scrofa (wild boar)                        | -----        | 2 hits [even-toed ungulates] PREDICTED: Sus scrofa Bak protein (BAK), mRNA             |
| • Patiria miniata                               | -----        | 1 hit [starfish] TSA: Patiria miniata isotig20647.Pminagast mRNA sequence              |
| • Equus caballus (equine)                       | -----        | 2 hits [odd-toed ungulates] PREDICTED: Equus caballus similar to Bcl-2 antagonist/kil  |
| • Pongo abelii (Orang-utan)                     | -----        | 3 hits [primates] PREDICTED: Pongo abelii bcl-2 homologous antagonist/kille            |
| • Mus musculus (mouse)                          | -----        | 6 hits [rodents] Mus musculus BCL2-antagonist/killer 1 (Bak1), mRNA                    |
| • Rattus norvegicus (brown rat)                 | -----        | 3 hits [rodents] Rattus norvegicus BCL2-antagonist/killer 1 (Bak1), mRNA >             |
| • Cricetulus griseus (Chinese hamsters)         | -----        | 2 hits [rodents] Cricetulus griseus Bak mRNA, complete cds                             |
| • Xenopus (Silurana) tropicalis                 | -----        | 1 hit [frogs & toads] PREDICTED: Xenopus (Silurana) tropicalis bcl-2 homologous        |
| • Xenopus laevis (common platanna)              | -----        | 2 hits [frogs & toads] Xenopus laevis BCL2-antagonist/killer 1 (bak1), mRNA >gi        |
| • Saccoglossus kowalevskii                      | -----        | 1 hit [hemichordates] PREDICTED: Saccoglossus kowalevskii predicted Bcl-2 prote        |
| • Saimiri boliviensis                           | -----        | 1 hit [primates] Saimiri boliviensis BCL2-like protein 1 (Bcl2L1) mRNA, cc             |
| • Aotus vociferans (Spix's night monkey)        | -----        | 1 hit [primates] Aotus vociferans BCL2-like protein 1 (Bcl2L1) mRNA, compl             |
| • Taeniopygia guttata (zebra finch)             | -----        | 1 hit [birds] PREDICTED: Taeniopygia guttata BCL2-like 1 (LOC100224900)                |
| • Felis catus (cat)                             | -----        | 1 hit [carnivores] Felis catus BCL2L1 (BCL2L1) mRNA, partial cds                       |
| • Spermophilus tridecemlineatus                 | -----        | 1 hit [rodents] Spermophilus tridecemlineatus Bcl-XL (Bcl-XL) mRNA, parti              |
| • Trichoplax adhaerens                          | -----        | 1 hit [placozoans] Trichoplax adhaerens expressed hypothetical protein, mRNA           |
| • synthetic construct                           | -----        | 11 hits [other sequences] Synthetic construct Homo sapiens clone IMAGE:100010199; F    |

#### Organism Report

|                                                                                                                                                                                                                                                                                                                                                                                                                 |                          |
|-----------------------------------------------------------------------------------------------------------------------------------------------------------------------------------------------------------------------------------------------------------------------------------------------------------------------------------------------------------------------------------------------------------------|--------------------------|
| <a href="#">Acropora millepora</a> [stony corals] taxid 45264<br><a href="#">gb EZ037140.1</a> TSA: Acropora millepora SeqIndex7167, mRNA ...                                                                                                                                                                                                                                                                   | 0.0                      |
| <a href="#">Nematostella vectensis</a> [sea anemones] taxid 45351<br><a href="#">ref XM 001641905.1</a> Nematostella vectensis predicted prote...                                                                                                                                                                                                                                                               | 0.0                      |
| <a href="#">Branchiostoma floridae</a> [lancelets] taxid 7739<br><a href="#">ref XM 002589394.1</a> Branchiostoma floridae hypothetical pr...                                                                                                                                                                                                                                                                   | 0.0                      |
| <a href="#">Hydra magnipapillata</a> [hydrozoans] taxid 6085<br><a href="#">ref XM 002160789.1</a> PREDICTED: Hydra magnipapillata simila...<br><a href="#">ref XM 002167542.1</a> PREDICTED: Hydra magnipapillata simila...                                                                                                                                                                                    | 0.0<br>0.0               |
| <a href="#">Hydra vulgaris</a> [hydrozoans] taxid 6087<br><a href="#">gb EF104645.1</a> Hydra vulgaris bak mRNA, complete cds<br><a href="#">gb EU035764.1</a> Hydra vulgaris bcl-2-like 4 mRNA, complete cds                                                                                                                                                                                                   | 0.0<br>0.0               |
| <a href="#">Strongylocentrotus purpuratus</a> (purple urchin, ...) [sea urchins] taxid 7668<br><a href="#">ref XM 001204408.1</a> PREDICTED: Strongylocentrotus purpurat...<br><a href="#">ref XM 788104.1</a> PREDICTED: Strongylocentrotus purpuratus ...                                                                                                                                                     | 0.0<br>0.0               |
| <a href="#">Monodelphis domestica</a> [marsupials] taxid 13616<br><a href="#">ref XM 001377739.1</a> PREDICTED: Monodelphis domestica simil...                                                                                                                                                                                                                                                                  | 0.0                      |
| <a href="#">Gallus gallus</a> (bantam, ...) [birds] taxid 9031<br><a href="#">ref NM 001030920.1</a> Gallus gallus BCL2-antagonist/killer 1...<br><a href="#">emb AJ851496.1</a> Gallus gallus mRNA for hypothetical protei...<br><a href="#">gb AC161468.2</a> Gallus gallus BAC clone CH261-94J19 from ch...                                                                                                  | 0.0<br>0.0<br>0.0        |
| <a href="#">Ailuropoda melanoleuca</a> [carnivores] taxid 9646<br><a href="#">ref XM 002914323.1</a> PREDICTED: Ailuropoda melanoleuca bcl-...<br><a href="#">ref XM 002918283.1</a> PREDICTED: Ailuropoda melanoleuca bcl-...                                                                                                                                                                                  | 0.0<br>0.0               |
| <a href="#">Callithrix jacchus</a> (common marmoset, ...) [primates] taxid 9483<br><a href="#">ref XM 002746436.1</a> PREDICTED: Callithrix jacchus bcl-2 ho...<br><a href="#">ref XM 002747334.1</a> PREDICTED: Callithrix jacchus bcl-2-li...<br><a href="#">ref XM 002747333.1</a> PREDICTED: Callithrix jacchus bcl-2-li...<br><a href="#">ref XM 002747332.1</a> PREDICTED: Callithrix jacchus bcl-2-li... | 0.0<br>0.0<br>0.0<br>0.0 |
| <a href="#">Canis lupus familiaris</a> (dogs) [carnivores] taxid 9615<br><a href="#">ref NM 001020808.1</a> Canis lupus familiaris BCL2-antagonist...<br><a href="#">gb DQ002813.1</a> Canis familiaris Bcl-2 antagonist/killer pr...                                                                                                                                                                           | 0.0<br>0.0               |
| <a href="#">Oryctolagus cuniculus</a> (domestic rabbit, ...) [rabbits & hares] taxid 9986                                                                                                                                                                                                                                                                                                                       |                          |

ref|XM 002714580.1| PREDICTED: *Oryctolagus cuniculus* BCL2-... 0.0

***Ovis aries*** (domestic sheep, ...) [[even-toed ungulates](#)] taxid 9940  
gb|AF164518.1|AF164518 *Ovis aries* Bak protein mRNA, partia... 0.0

**Human sapiens** (man) [[primates](#)] taxid 9606  
ref|NM 001188.3| Homo sapiens BCL2-antagonist/killer 1 (BA... 0.0  
gb|BC004431.1| Homo sapiens BCL2-antagonist/killer 1, mRNA... 0.0  
gb|BC032789.1| Homo sapiens cDNA clone IMAGE:5213984, cont... 0.0  
gb|U16811.1|HSU16811 Human Bak mRNA, complete cds 0.0  
emb|CR615881.1| full-length cDNA clone CSODC002YE18 of Neu... 0.0  
emb|CR600490.1| full-length cDNA clone CSODL011YK12 of B c... 0.0  
dbj|AK091807.1| Homo sapiens cDNA FLJ34488 fis, clone HLUN... 0.0  
emb|CR615932.1| full-length cDNA clone CSODI010YJ01 of Pla... 0.0  
gb|U23765.1|HSU23765 Human Bak protein mRNA, complete cds 0.0  
dbj|AK293547.1| Homo sapiens cDNA FLJ55169 complete cds, h... 0.0  
emb|X84213.1| H.sapiens BAK mRNA for BCL-2 homologue 0.0  
emb|CR457419.1| Homo sapiens full open reading frame cDNA ... 0.0  
gb|AF520590.1| Homo sapiens pro-apoptotic protein BAKM var... 0.0  
emb|BX640505.3| Human DNA sequence from clone WI2-82760E2 ... 0.0  
gb|U16812.1|HSU16812 Human Bak-2 gene, complete cds 0.0  
ref|NG 000850.5| Homo sapiens BCL2-antagonist/killer 1 pse... 0.0  
ref|XM 002348050.2| PREDICTED: Homo sapiens putative Bcl-2... 0.0  
dbj|AK292093.1| Homo sapiens cDNA FLJ75165 complete cds, h... 0.0  
gb|BC110337.1| Homo sapiens BCL2-antagonist/killer 1, mRNA... 0.0  
emb|CR627020.1| Homo sapiens mRNA; cDNA DKFZp686D0345 (fro... 0.0  
gb|AY260471.1| Homo sapiens BCL2-antagonist/killer 1 (BAK1... 0.0  
emb|Z93017.6| Human DNA sequence from clone RPL-291J10 on ... 0.0

**Pan troglodytes** [[primates](#)] taxid 9598  
ref|XM 518407.2| PREDICTED: Pan troglodytes BCL2-antagonis... 0.0  
ref|XM 001171325.1| PREDICTED: Pan troglodytes BCL2-antago... 0.0  
gb|AC191941.3| Pan troglodytes BAC clone CH251-384C22 from... 0.0  
ref|XM 514565.2| PREDICTED: Pan troglodytes BCL2-like 1, t... 0.0

**Macaca mulatta** (rhesus macaque, ...) [[primates](#)] taxid 9544  
ref|XM 001090570.2| PREDICTED: Macaca mulatta BCL2-antagon... 0.0  
ref|XM 002803988.1| PREDICTED: Macaca mulatta BCL2-antagon... 0.0  
ref|XM 002803989.1| PREDICTED: Macaca mulatta BCL2-antagon... 0.0  
ref|XM 001110113.2| PREDICTED: Macaca mulatta bcl-2-like p... 0.0  
ref|XM 001110062.2| PREDICTED: Macaca mulatta bcl-2-like p... 0.0  
ref|XM 001110205.2| PREDICTED: Macaca mulatta bcl-2-like p... 0.0  
ref|XM 001110326.1| PREDICTED: Macaca mulatta bcl-2-like p... 0.0  
ref|XM 001110285.1| PREDICTED: Macaca mulatta bcl-2-like p... 0.0

**synthetic construct** [[other sequences](#)] taxid 32630  
gb|DQ895739.2| Synthetic construct Homo sapiens clone IMAG... 0.0  
gb|DQ895257.2| Synthetic construct clone IMAGE:100005157; ... 0.0  
dbj|AB590158.1| Synthetic construct DNA, clone: pFN21AB694... 0.0  
gb|AY893853.1| Synthetic construct Homo sapiens clone FLH0... 0.0  
gb|AY893403.1| Synthetic construct Homo sapiens clone FLH0... 0.0  
gb|AY889585.1| Synthetic construct Homo sapiens clone FLH1... 0.0  
dbj|AB528577.1| Synthetic construct DNA, clone: pFKB6997,... 0.0  
emb|CU678721.1| Synthetic construct Homo sapiens gateway c... 0.0  
dbj|AB464466.1| Synthetic construct DNA, clone: pFKB8901,... 0.0  
gb|DQ896311.2| Synthetic construct Homo sapiens clone IMAG... 0.0  
gb|DQ893461.2| Synthetic construct clone IMAGE:100006091; ... 0.0

**Bos taurus** (cow, ...) [[even-toed ungulates](#)] taxid 9913  
gb|BT030701.1| Bos taurus BCL2-antagonist/killer 1 (BAK1),... 0.0  
gb|BC146049.1| Bos taurus BCL2-antagonist/killer 1, mRNA (... 0.0  
ref|NM 001077918.1| Bos taurus BCL2-antagonist/killer 1 (B... 0.0  
dbj|AB238939.1| Bos taurus BAK1 mRNA for Bcl-2 homologous ... 0.0  
gb|HM630302.1| Bos taurus BCL2-like protein 1 (Bcl2L1) mRNA... 0.0  
gb|BC147863.1| Bos taurus BCL2-like 1, mRNA (cDNA clone MG... 0.0  
ref|NM 001077486.2| Bos taurus BCL2-like 1 (BCL2L1), nucle... 0.0  
gb|BC133281.1| Bos taurus BCL2-like 1, mRNA (cDNA clone MG... 0.0  
dbj|AB238936.1| Bos taurus BCL2L1 mRNA for BCL2-like 1 tra... 0.0

**Sus scrofa** (wild boar, ...) [[even-toed ungulates](#)] taxid 9823  
ref|XM 001928147.2| PREDICTED: Sus scrofa Bak protein (BAK... 0.0  
emb|CU498854.16| Pig DNA sequence from clone CH242-216B14 ... 0.0

**Patiria miniata** [[starfish](#)] taxid 46514  
gb|HP125449.1| TSA: Patiria miniata isotig20647.Pminagast ... 0.0

**Equus caballus** (equine, ...) [[odd-toed ungulates](#)] taxid 9796  
ref|XM 001497824.1| PREDICTED: Equus caballus similar to B... 0.0  
ref|XM 001499714.1| PREDICTED: Equus caballus similar to B... 0.0

**Pongo abelii** (Orang-utan, ...) [[primates](#)] taxid 9601  
ref|XM 002824315.1| PREDICTED: Pongo abelii bcl-2 homologo... 0.0  
ref|XM 002816764.1| PREDICTED: Pongo abelii bcl-2 homologo... 0.0  
ref|XM 002830190.1| PREDICTED: Pongo abelii bcl-2-like pro... 0.0

**Mus musculus** (mouse) [[rodents](#)] taxid 10090  
ref|NM 007523.2| Mus musculus BCL2-antagonist/killer 1 (Ba... 0.0  
emb|Y13231.1| Mus musculus mRNA for Bak 0.0  
dbj|AK089220.1| Mus musculus NOD-derived CD11c +ve dendrit... 0.0  
gb|BC057589.1| Mus musculus BCL2-antagonist/killer 1, mRNA... 0.0  
gb|AF402617.1|AF402617 Mus musculus N-BAK1 (Bak1) mRNA, co... 0.0  
ref|NM 009743.4| Mus musculus BCL2-like 1 (Bcl2l1), nuclea... 0.0

**Rattus norvegicus** (brown rat, ...) [[rodents](#)] taxid 10116  
ref|NM 053812.1| Rattus norvegicus BCL2-antagonist/killer ... 0.0  
gb|AF259504.1| Rattus norvegicus BAK protein (Bak) mRNA, c... 0.0  
gb|BC089784.1| Rattus norvegicus BCL2-antagonist/killer 1,... 0.0

**Cricetulus griseus** (Chinese hamsters) [[rodents](#)] taxid 10029  
gb|EF104644.1| Cricetulus griseus Bak mRNA, complete cds 0.0  
gb|EU596590.1| Cricetulus griseus Bcl-xL mRNA, complete cds 0.0

**Xenopus (Silurana) tropicalis** [[frogs & toads](#)] taxid 8364  
ref|XM 002936222.1| PREDICTED: Xenopus (Silurana) tropical... 0.0

**Xenopus laevis** (common platanna, ...) [[frogs & toads](#)] taxid 8355  
ref|NM 001096118.1| Xenopus laevis BCL2-antagonist/killer ... 0.0  
gb|BC099018.1| Xenopus laevis hypothetical protein MGC1154... 0.0

|                                                                                                 |     |     |
|-------------------------------------------------------------------------------------------------|-----|-----|
| <a href="#">Trichoplax adhaerens</a> [ <a href="#">placozoans</a> ] taxid 10228                 |     |     |
| <a href="#">ref XM_002117760.1 </a> Trichoplax adhaerens expressed hypothe...                   | ___ | 0.0 |
| <a href="#">Saccoglossus kowalevskii</a> [ <a href="#">hemichordates</a> ] taxid 10224          |     |     |
| <a href="#">ref XM_002740743.1 </a> PREDICTED: Saccoglossus kowalevskii pr...                   | ___ | 0.0 |
| <a href="#">Saimiri boliviensis</a> [ <a href="#">primates</a> ] taxid 27679                    |     |     |
| <a href="#">gb HM630305.1 </a> Saimiri boliviensis BCL2-like protein 1 (Bc...                   | ___ | 0.0 |
| <a href="#">Aotus vociferans</a> (Spix's night monkey) [ <a href="#">primates</a> ] taxid 57176 |     |     |
| <a href="#">gb HM630303.1 </a> Aotus vociferans BCL2-like protein 1 (Bcl2L...                   | ___ | 0.0 |
| <a href="#">Taeniopygia guttata</a> (zebra finch) [ <a href="#">birds</a> ] taxid 59729         |     |     |
| <a href="#">ref XM_002193086.1 </a> PREDICTED: Taeniopygia guttata BCL2-li...                   | ___ | 0.0 |
| <a href="#">Felis catus</a> (cat, ...) [ <a href="#">carnivores</a> ] taxid 9685                |     |     |
| <a href="#">gb DQ926873.1 </a> Felis catus BCL2L1 (BCL2L1) mRNA, partial cds                    | ___ | 0.0 |
| <a href="#">Spermophilus tridecemlineatus</a> [ <a href="#">rodents</a> ] taxid 43179           |     |     |
| <a href="#">gb DQ503423.1 </a> Spermophilus tridecemlineatus Bcl-XL (Bcl-X...                   | ___ | 0.0 |

## Taxonomy Report

|                                     |          |         |                                                                          |
|-------------------------------------|----------|---------|--------------------------------------------------------------------------|
| root .....                          | 106 hits | 34 orgs |                                                                          |
| Metazoa .....                       | 95 hits  | 33 orgs | [cellular organisms; Eukaryota; Fungi/Metazoa group]                     |
| Eumetazoa .....                     | 94 hits  | 32 orgs |                                                                          |
| Cnidaria .....                      | 6 hits   | 4 orgs  |                                                                          |
| Hexacorallia .....                  | 2 hits   | 2 orgs  | [Anthozoa]                                                               |
| Acropora millepora .....            | 1 hits   | 1 orgs  | [Scleractinia; Astrocoeniina; Acroporidae; Acropora]                     |
| Nematostella vectensis .....        | 1 hits   | 1 orgs  | [Actiniaria; Edwardsiidae; Nematostella]                                 |
| Hydra .....                         | 4 hits   | 2 orgs  | [Hydrozoa; Hydroida; Anthomedusae; Hydridae]                             |
| Hydra magnipapillata .....          | 2 hits   | 1 orgs  |                                                                          |
| Hydra vulgaris .....                | 2 hits   | 1 orgs  |                                                                          |
| Deuterostomia .....                 | 88 hits  | 28 orgs | [Bilateria; Coelomata]                                                   |
| Chordata .....                      | 84 hits  | 25 orgs |                                                                          |
| Branchiostoma floridae .....        | 1 hits   | 1 orgs  | [Cephalochordata; Branchiostomidae; Branchiostoma]                       |
| Tetrapoda .....                     | 83 hits  | 24 orgs | [Craniata; Vertebrata; Gnathostomata; Teleostomi; Euteleostomi; Sarcop]  |
| Amniota .....                       | 80 hits  | 22 orgs |                                                                          |
| Theria .....                        | 76 hits  | 20 orgs | [Mammalia]                                                               |
| Monodelphis domestica .....         | 1 hits   | 1 orgs  | [Metatheria; Didelphimorphia; Didelphidae; Didelphinae; Monodelphis]     |
| Eutheria .....                      | 75 hits  | 19 orgs |                                                                          |
| Laurasiatheria .....                | 19 hits  | 7 orgs  |                                                                          |
| Carnivora .....                     | 5 hits   | 3 orgs  |                                                                          |
| Caniformia .....                    | 4 hits   | 2 orgs  |                                                                          |
| Ailuropoda melanoleuca .....        | 2 hits   | 1 orgs  | [Ursidae; Ailuropoda]                                                    |
| Canis lupus familiaris .....        | 2 hits   | 1 orgs  | [Canidae; Canis; Canis lupus]                                            |
| Felis catus .....                   | 1 hits   | 1 orgs  | [Feliformia; Felidae; Felinae; Felis]                                    |
| Cetartiodactyla .....               | 12 hits  | 3 orgs  |                                                                          |
| Bovidae .....                       | 10 hits  | 2 orgs  | [Ruminantia; Pecora]                                                     |
| Ovis aries .....                    | 1 hits   | 1 orgs  | [Caprinae; Ovis]                                                         |
| Bos taurus .....                    | 9 hits   | 1 orgs  | [Bovinae; Bos]                                                           |
| Sus scrofa .....                    | 2 hits   | 1 orgs  | [Suina; Suidae; Sus]                                                     |
| Equus caballus .....                | 2 hits   | 1 orgs  | [Perissodactyla; Equidae; Equus; Equus subg. Equus]                      |
| Euarchontoglires .....              | 56 hits  | 12 orgs |                                                                          |
| Simiiformes .....                   | 43 hits  | 7 orgs  | [Primates; Haplorrhini]                                                  |
| Platyrrhini .....                   | 6 hits   | 3 orgs  |                                                                          |
| Cebidae .....                       | 5 hits   | 2 orgs  |                                                                          |
| Callithrix jacchus .....            | 4 hits   | 1 orgs  | [Callitrichinae; Callithrix]                                             |
| Saimiri boliviensis .....           | 1 hits   | 1 orgs  | [Saimiriinae; Saimiri]                                                   |
| Aotus vociferans .....              | 1 hits   | 1 orgs  | [Aotidae; Aotus]                                                         |
| Catarrhini .....                    | 37 hits  | 4 orgs  |                                                                          |
| Hominoidea .....                    | 29 hits  | 3 orgs  | [Hominoidea]                                                             |
| Homininae .....                     | 26 hits  | 2 orgs  |                                                                          |
| Homo sapiens .....                  | 22 hits  | 1 orgs  | [Homo]                                                                   |
| Pan troglodytes .....               | 4 hits   | 1 orgs  | [Pan]                                                                    |
| Pongo abelii .....                  | 3 hits   | 1 orgs  | [Ponginae; Pongo]                                                        |
| Macaca mulatta .....                | 8 hits   | 1 orgs  | [Cercopithecoidea; Cercopithecidae; Cercopithecinae; Macaca]             |
| Glires .....                        | 13 hits  | 5 orgs  |                                                                          |
| Oryctolagus cuniculus .....         | 1 hits   | 1 orgs  | [Lagomorpha; Leporidae; Oryctolagus]                                     |
| Sciurognathi .....                  | 12 hits  | 4 orgs  | [Rodentia]                                                               |
| Muroidea .....                      | 11 hits  | 3 orgs  |                                                                          |
| Murinae .....                       | 9 hits   | 2 orgs  | [Muridae]                                                                |
| Mus musculus .....                  | 6 hits   | 1 orgs  | [Mus; Mus]                                                               |
| Rattus norvegicus .....             | 3 hits   | 1 orgs  | [Rattus]                                                                 |
| Cricetulus griseus .....            | 2 hits   | 1 orgs  | [Cricetidae; Cricetinae; Cricetulus]                                     |
| Spermophilus tridecemlineatus ..... | 1 hits   | 1 orgs  | [Sciuridae; Xerinae; Marmotini; Spermophilus]                            |
| Neognathae .....                    | 4 hits   | 2 orgs  | [Sauropsida; Sauria; Archosauria; Dinosauria; Saurischia; Theropoda; C]  |
| Gallus gallus .....                 | 3 hits   | 1 orgs  | [Galliformes; Phasianidae; Phasianinae; Gallus]                          |
| Taeniopygia guttata .....           | 1 hits   | 1 orgs  | [Passeriformes; Passeroidea; Estrildidae; Estrildinae; Taeniopygia]      |
| Xenopus .....                       | 3 hits   | 2 orgs  | [Amphibia; Batrachia; Anura; Mesobatrachia; Pipioidea; Pipidae; Xenopod] |
| Xenopus (Silurana) tropicalis ..... | 1 hits   | 1 orgs  | [Silurana]                                                               |
| Xenopus laevis .....                | 2 hits   | 1 orgs  | [Xenopus]                                                                |
| Eleutherozoa .....                  | 3 hits   | 2 orgs  | [Echinodermata]                                                          |
| Strongylocentrotus purpuratus ..... | 2 hits   | 1 orgs  | [Echinozoa; Echinoidea; Euechinoidea; Echinacea; Echinoida; Strongyloc]  |
| Patiria miniata .....               | 1 hits   | 1 orgs  | [Asterozoa; Asteroidea; Valvataceae; Valvatida; Asterinidae; Patiria]    |
| Saccoglossus kowalevskii .....      | 1 hits   | 1 orgs  | [Hemichordata; Enteropneusta; Harrimanidae; Saccoglossus]                |
| Trichoplax adhaerens .....          | 1 hits   | 1 orgs  | [Placozoa; Trichoplax]                                                   |
| synthetic construct .....           | 11 hits  | 1 orgs  | [other sequences; artificial sequences]                                  |



# BLAST

## Basic Local Alignment Search Tool

[Jump to Page Content](#)

Job Title: EZ034459

### Tax BLAST Report

#### Index

- [Lineage Report](#)
- [Organism Report](#)
- [Taxonomy Report](#)
- [Help](#)

#### Lineage Report

|                                                 |              |                                                                                        |
|-------------------------------------------------|--------------|----------------------------------------------------------------------------------------|
| root                                            |              |                                                                                        |
| · Metazoa                                       | [animals]    |                                                                                        |
| · Eumetazoa                                     | [animals]    |                                                                                        |
| · Cnidaria                                      | [cnidarians] |                                                                                        |
| · Hexacorallia                                  | [anthozoans] |                                                                                        |
| · Acropora millepora                            | -----        | 1 hit [stony corals] TSA: Acropora millepora SeqIndex6501, mRNA sequence               |
| · Nematostella vectensis                        | -----        | 1 hit [sea anemones] Nematostella vectensis predicted protein (NEMVEDRAFT_v1q1         |
| · Hydra magnipapillata                          | -----        | 2 hits [hydrozoans] PREDICTED: Hydra magnipapillata similar to predicted prot          |
| · Ciona intestinalis                            | -----        | 2 hits [tunicates] PREDICTED: Ciona intestinalis similar to Bcl2-associated            |
| · Crepidula fornicata                           | -----        | 1 hit [gastropods] TSA: Crepidula fornicata 8158.Cfedg                                 |
| · Monodelphis domestica                         | -----        | 1 hit [marsupials] PREDICTED: Monodelphis domestica similar to Bax alpha (LO           |
| · Strongylocentrotus purpuratus (purple urchin) | -----        | 2 hits [sea urchins] PREDICTED: Strongylocentrotus purpuratus similar to Bax a         |
| · Plakobranthus ocellatus                       | -----        | 1 hit [gastropods] TSA: Plakobranthus ocellatus 26778.Plocadul mRNA sequenc            |
| · Mus musculus (mouse)                          | -----        | 8 hits [rodents] Mus musculus osteoclast-like cell cDNA, RIKEN full-length             |
| · Sus scrofa (wild boar)                        | -----        | 1 hit [even-toed ungulates] Sus scrofa partial mRNA for Bax-alpha protein              |
| · Tetraodon nigroviridis                        | -----        | 2 hits [bony fishes] Tetraodon nigroviridis full-length cDNA                           |
| · Canis lupus familiaris (dogs)                 | -----        | 2 hits [carnivores] Canis lupus familiaris BCL2-associated X protein (BAX), m          |
| · Felis catus (cat)                             | -----        | 2 hits [carnivores] Felis catus BCL2-associated X protein (BAX), mRNA >gi 255          |
| · Bos taurus (cow)                              | -----        | 4 hits [even-toed ungulates] Bos taurus BCL2-associated X protein (BAX), mRNA >gi 1938 |
| · Ovis aries (domestic sheep)                   | -----        | 1 hit [even-toed ungulates] Ovis aries BCL2-associated protein Bax (Bax) mRNA, partia  |
| · Callithrix jacchus (common marmoset)          | -----        | 1 hit [primates] PREDICTED: Callithrix jacchus apoptosis regulator BAX-lik             |
| · Cervus elaphus (elk)                          | -----        | 1 hit [even-toed ungulates] Cervus elaphus bax mRNA, partial cds                       |
| · Pan troglodytes                               | -----        | 1 hit [primates] PREDICTED: Pan troglodytes similar to Bax alpha (LOC74709             |
| · Homo sapiens (man)                            | -----        | 21 hits [primates] Homo sapiens BCL2-associated X protein (BAX), transcript            |
| · Macaca mulatta (rhesus macaque)               | -----        | 4 hits [primates] PREDICTED: Macaca mulatta BCL2-associated X protein, tran            |
| · Rattus norvegicus (brown rat)                 | -----        | 8 hits [rodents] Rattus norvegicus Bcl2-associated X protein (Bax), mRNA >             |
| · Danio rerio (zebra fish)                      | -----        | 4 hits [bony fishes] Danio rerio bcl2-associated X protein, a (baxa), mRNA >gi         |
| · Xenopus laevis (common platanna)              | -----        | 5 hits [frogs & toads] Xenopus laevis BCL2-associated X protein (bax), mRNA >gi        |
| · Oryctolagus cuniculus (domestic rabbit)       | -----        | 3 hits [rabbits & hares] PREDICTED: Oryctolagus cuniculus BCL2-associated X protei     |
| · Xenopus (Silurana) tropicalis                 | -----        | 3 hits [frogs & toads] Xenopus tropicalis finished cDNA, clone TGas091104              |
| · Rattus sp. (rats)                             | -----        | 1 hit [rodents] bax=apoptosis inducer [rats, ovary, mRNA Partial, 402 nt]              |
| · Cricetulus griseus (Chinese hamsters)         | -----        | 1 hit [rodents] Cricetulus griseus Bax mRNA, complete cds                              |
| · Mesocricetus auratus (Syrian hamster)         | -----        | 1 hit [rodents] Mesocricetus auratus partial mRNA for Bcl-2 associated pr              |
| · Ictalurus punctatus                           | -----        | 1 hit [bony fishes] Ictalurus punctatus clone CBZB25609 apoptosis regulator b          |
| · Epinephelus coioides (estuary rock cod)       | -----        | 1 hit [bony fishes] Epinephelus coioides bcl2-associated X (BAX) mRNA, partia          |
| · Ailurogobius melanoleuca                      | -----        | 1 hit [carnivores] PREDICTED: Ailurogobius melanoleuca apoptosis regulator BAX         |
| · Taeniopygia guttata (zebra finch)             | -----        | 1 hit [birds] PREDICTED: Taeniopygia guttata similar to BCL2-associated                |
| · Bos grunniens (yak)                           | -----        | 1 hit [even-toed ungulates] Bos grunniens apoptosis regulator bax-alpha (bax) mRNA, p  |
| · Ictalurus furcatus                            | -----        | 2 hits [bony fishes] TSA: Ictalurus furcatus Contig02971.Icfu mRNA sequence            |
| · Oncorhynchus mykiss                           | -----        | 1 hit [bony fishes] Oncorhynchus mykiss clone omyk-evo-502-314 Apoptosis regu          |
| · Gallus gallus (bantam)                        | -----        | 1 hit [birds] Gallus gallus myeloid cell leukemia protein MCL-1 mRNA, p                |
| · Salmo salar                                   | -----        | 5 hits [bony fishes] Salmo salar clone ssal-eve-501-321 Apoptosis regulator BA         |
| · Trichoplax adhaerens                          | -----        | 1 hit [placozoans] Trichoplax adhaerens hypothetical protein, mRNA                     |
| · synthetic construct                           | -----        | 7 hits [other sequences] Synthetic construct Homo sapiens gateway clone IMAGE:1000     |

#### Organism Report

|                                                                                             |     |
|---------------------------------------------------------------------------------------------|-----|
| <a href="#">Acropora millepora</a> [stony corals] taxid 45264                               |     |
| <a href="#">gb EZ034459.1</a> TSA: Acropora millepora SeqIndex6501, mRNA ...                | 0.0 |
| <a href="#">Nematostella vectensis</a> [sea anemones] taxid 45351                           |     |
| <a href="#">ref XM_001634806.1</a> Nematostella vectensis predicted prote...                | 0.0 |
| <a href="#">Hydra magnipapillata</a> [hydrozoans] taxid 6085                                |     |
| <a href="#">ref XM_002157424.1</a> PREDICTED: Hydra magnipapillata simila...                | 0.0 |
| <a href="#">ref XM_002158033.1</a> PREDICTED: Hydra magnipapillata simila...                | 0.0 |
| <a href="#">Trichoplax adhaerens</a> [placozoans] taxid 10228                               |     |
| <a href="#">ref XM_002107647.1</a> Trichoplax adhaerens hypothetical prot...                | 0.0 |
| <a href="#">Ciona intestinalis</a> [tunicates] taxid 7719                                   |     |
| <a href="#">ref XM_002122967.1</a> PREDICTED: Ciona intestinalis similar ...                | 0.0 |
| <a href="#">dbj AK116369.1</a> Ciona intestinalis cDNA, clone:citb036h13,...                | 0.0 |
| <a href="#">Crepidula fornicata</a> [gastropods] taxid 176853                               |     |
| <a href="#">gb EZ548265.1</a> TSA: Crepidula fornicata 8158.Cfedg                           | 0.0 |
| <a href="#">Monodelphis domestica</a> [marsupials] taxid 13616                              |     |
| <a href="#">ref XM_001379887.1</a> PREDICTED: Monodelphis domestica simil...                | 0.0 |
| <a href="#">Strongylocentrotus purpuratus</a> (purple urchin, ...) [sea urchins] taxid 7668 |     |
| <a href="#">ref XM_001188066.1</a> PREDICTED: Strongylocentrotus purpurat...                | 0.0 |
| <a href="#">ref XM_786025.2</a> PREDICTED: Strongylocentrotus purpuratus ...                | 0.0 |
| <a href="#">Plakobranthus ocellatus</a> [gastropods] taxid 259542                           |     |
| <a href="#">gb HP190622.1</a> TSA: Plakobranthus ocellatus 26778.Plocadul...                | 0.0 |
| <a href="#">Mus musculus</a> (mouse) [rodents] taxid 10090                                  |     |
| <a href="#">dbj AK159233.1</a> Mus musculus osteoclast-like cell cDNA, RI...                | 0.0 |
| <a href="#">gb AY095934.1</a> Mus musculus Bcl2-associated X protein kapp...                | 0.0 |
| <a href="#">ref NM_007527.3</a> Mus musculus BCL2-associated X protein (B...                | 0.0 |
| <a href="#">gb BC018228.1</a> Mus musculus BCL2-associated X protein, mRN...                | 0.0 |
| <a href="#">gb BC053380.1</a> Mus musculus BCL2-associated X protein, mRNA...               | 0.0 |
| <a href="#">dbj AK013298.1</a> Mus musculus 10, 11 days embryo whole body...                | 0.0 |
| <a href="#">dbj AK149994.1</a> Mus musculus bone marrow macrophage cDNA, ...                | 0.0 |
| <a href="#">gb L22472.1</a> MUSBAXA Mouse Bax alpha mRNA, complete cds                      | 0.0 |

[Sus scrofa](#) (wild boar, ...) [[even-toed ungulates](#)] taxid 9823  
emb|AJ606301.1| Sus scrofa partial mRNA for Bax-alpha protein 0.0

[Tetraodon nigroviridis](#) [[bony fishes](#)] taxid 99883  
emb|CR696948.1| Tetraodon nigroviridis full-length cDNA 0.0  
emb|CR668488.2| Tetraodon nigroviridis full-length cDNA 0.0

[Canis lupus familiaris](#) (dogs) [[carnivores](#)] taxid 9615  
ref|NM\_001003011.1| Canis lupus familiaris BCL2-associated... 0.0  
dbj|AB080230.1| Canis lupus familiaris mRNA for Bax, compl... 0.0

[Felis catus](#) (cat, ...) [[carnivores](#)] taxid 9685  
ref|NM\_001009282.1| Felis catus BCL2-associated X protein ... 0.0  
dbj|AB080724.2| Felis catus mRNA for bax-protein, complete... 0.0

[Bos taurus](#) (cow, ...) [[even-toed ungulates](#)] taxid 9913  
ref|NM\_173894.1| Bos taurus BCL2-associated X protein (BAX... 0.0  
gb|U92569.1|BTU92569 Bos taurus apoptosis regulator bax-al... 0.0  
ref|NM\_001191220.1| Bos taurus BCL2-associated X protein (... 0.0  
ref|XM\_002701934.1| PREDICTED: Bos taurus BCL2-associated ... 0.0

[Ovis aries](#) (domestic sheep, ...) [[even-toed ungulates](#)] taxid 9940  
gb|AF163774.1|AF163774 Ovis aries Bcl2-associated protein ... 0.0

[Callithrix jacchus](#) (common marmoset, ...) [[primates](#)] taxid 9483  
ref|XM\_002807856.1| PREDICTED: Callithrix jacchus apoptosi... 0.0

[Cervus elaphus](#) (elk) [[even-toed ungulates](#)] taxid 9860  
gb|AF512030.1| Cervus elaphus bax mRNA, partial cds 0.0

[Pan troglodytes](#) [[primates](#)] taxid 9598  
ref|XM\_001155879.1| PREDICTED: Pan troglodytes similar to ... 0.0

[Homo sapiens](#) (man) [[primates](#)] taxid 9606  
ref|NM\_138761.3| Homo sapiens BCL2-associated X protein (B... 0.0  
gb|BC014175.2| Homo sapiens BCL2-associated X protein, mRN... 0.0  
dbj|AK291076.1| Homo sapiens cDNA FLJ77115 complete cds, h... 0.0  
emb|CR595189.1| full-length cDNA clone CS0DE013YL22 of Pla... 0.0  
gb|L22473.1|HUMBAXA Human Bax alpha mRNA, complete cds 0.0  
emb|AJ417988.1| Homo sapiens mRNA for bax isoform psi (BAX... 0.0  
ref|NM\_138763.3| Homo sapiens BCL2-associated X protein (B... 0.0  
gb|U19599.1|HSU19599 Human (BAX delta) mRNA, complete cds 0.0  
gb|AF250190.1|AF250190 Homo sapiens Bax zeta mRNA, complet... 0.0  
ref|NR\_027882.1| Homo sapiens BCL2-associated X protein (B... 0.0  
gb|AF007826.1|AF007826 Homo sapiens bax epsilon mRNA, comp... 0.0  
ref|NM\_004324.3| Homo sapiens BCL2-associated X protein (B... 0.0  
gb|L22474.1|HUMBAXB Human Bax beta mRNA, complete cds 0.0  
emb|AJ586910.1| Homo sapiens partial mRNA for bax protein ... 0.0  
emb|AJ586909.1| Homo sapiens partial mRNA for bax protein ... 0.0  
ref|NM\_138764.4| Homo sapiens BCL2-associated X protein (B... 0.0  
gb|AF247393.1|AF247393 Homo sapiens bax-sigma mRNA, comple... 0.0  
gb|AY217036.1| Homo sapiens BCL2-associated X protein (BAX... 0.0  
ref|NG\_012191.1| Homo sapiens BCL2-associated X protein (B... 0.0  
gb|AC015871.7| Homo sapiens chromosome 15, clone RP11-81A1... 0.0  
dbj|AK304026.1| Homo sapiens cDNA FLJ60214 complete cds, h... 0.0

[Macaca mulatta](#) (rhesus macaque, ...) [[primates](#)] taxid 9544  
ref|XM\_002801334.1| PREDICTED: Macaca mulatta BCL2-associa... 0.0  
ref|XM\_001112353.1| PREDICTED: Macaca mulatta BCL2-associa... 0.0  
ref|XM\_002801333.1| PREDICTED: Macaca mulatta BCL2-associa... 0.0  
ref|XM\_002801332.1| PREDICTED: Macaca mulatta BCL2-associa... 0.0

[Rattus norvegicus](#) (brown rat, ...) [[rodents](#)] taxid 10116  
ref|NM\_017059.1| Rattus norvegicus Bcl2-associated X prote... 0.0  
gb|U49729.1|RRU49729 Rattus norvegicus rBax alpha mRNA, co... 0.0  
gb|AF235993.1|AF235993 Rattus norvegicus Bax protein splic... 0.0  
emb|FQ229844.1| Rattus norvegicus TLOADA46YH24 mRNA sequence 0.0  
gb|U59184.1|RNU59184 Rattus norvegicus Bax-alpha mRNA, par... 0.0  
gb|U32098.1|RNU32098 Rattus norvegicus bax mRNA, partial cds 0.0  
ref|XM\_001060981.2| PREDICTED: Rattus norvegicus similar t... 0.0  
ref|XM\_001081479.2| PREDICTED: Rattus norvegicus similar t... 0.0

[Danio rerio](#) (zebra fish, ...) [[bony fishes](#)] taxid 7955  
ref|NM\_131562.2| Danio rerio bcl2-associated X protein, a ... 0.0  
gb|BC055592.1| Danio rerio bcl2-associated X protein, a, m... 0.0  
gb|BC164990.1| Danio rerio bcl2-associated X protein, a, m... 0.0  
gb|AF231015.1|AF231015 Danio rerio Bax (bax) gene, complet... 0.0

[Xenopus laevis](#) (common platanna, ...) [[frogs & toads](#)] taxid 8355  
ref|NM\_001085635.1| Xenopus laevis BCL2-associated X prote... 0.0  
gb|AF288809.1|AF288809 Xenopus laevis bax mRNA, complete cds 0.0  
gb|BC169589.1| Xenopus laevis BCL2-associated X protein, m... 0.0  
gb|BC169587.1| Xenopus laevis BCL2-associated X protein, m... 0.0  
gb|AY437085.1| Xenopus laevis Bax mRNA, complete cds 0.0

[Oryctolagus cuniculus](#) (domestic rabbit, ...) [[rabbits & hares](#)] taxid 9986  
ref|XM\_002723696.1| PREDICTED: Oryctolagus cuniculus BCL2-... 0.0  
ref|XM\_002723697.1| PREDICTED: Oryctolagus cuniculus BCL2-... 0.0  
ref|XM\_002722959.1| PREDICTED: Oryctolagus cuniculus BCL2-... 0.0

[Xenopus \(Silurana\) tropicalis](#) [[frogs & toads](#)] taxid 8364  
emb|CR85728.2| Xenopus tropicalis finished cDNA, clone TG... 0.0  
ref|NM\_203854.1| Xenopus (Silurana) tropicalis BCL2-associ... 0.0  
gb|BC063201.1| Xenopus tropicalis BCL2-associated X protei... 0.0

[Rattus sp.](#) (rats) [[rodents](#)] taxid 10118  
gb|S76511.1| bax=apoptosis inducer [rats, ovary, mRNA Part... 0.0

[Cricetulus griseus](#) (Chinese hamsters) [[rodents](#)] taxid 10029  
gb|EF104643.1| Cricetulus griseus Bax mRNA, complete cds 0.0

[Mesocricetus auratus](#) (Syrian hamster, ...) [[rodents](#)] taxid 10036  
emb|AJ582075.1| Mesocricetus auratus partial mRNA for Bcl-... 0.0

[Ictalurus punctatus](#) [[bony fishes](#)] taxid 7998  
gb|GU589276.1| Ictalurus punctatus clone CBZB25609 apoptos... 0.0

|                                                                                                          |     |  |
|----------------------------------------------------------------------------------------------------------|-----|--|
| <a href="#">synthetic construct</a> [other sequences] taxid 32630                                        |     |  |
| <a href="#">emb CU680816.1 </a> Synthetic construct Homo sapiens gateway c...                            | 0.0 |  |
| <a href="#">gb EU716633.1 </a> Synthetic construct N-EGFP/BCL2-associated ...                            | 0.0 |  |
| <a href="#">dbj AB528719.1 </a> Synthetic construct DNA, clone: pF1KB6979,...                            | 0.0 |  |
| <a href="#">gb AY891226.1 </a> Synthetic construct Homo sapiens clone FLH1...                            | 0.0 |  |
| <a href="#">gb AY888578.1 </a> Synthetic construct Homo sapiens clone FLH1...                            | 0.0 |  |
| <a href="#">gb AY893763.1 </a> Synthetic construct Homo sapiens clone FLH0...                            | 0.0 |  |
| <a href="#">gb AY893312.1 </a> Synthetic construct Homo sapiens clone FLH0...                            | 0.0 |  |
| <br>                                                                                                     |     |  |
| <a href="#">Epinephelus coioides</a> (estuary rock cod, ...) [ <a href="#">bony fishes</a> ] taxid 94232 |     |  |
| <a href="#">gb AY735005.1 </a> Epinephelus coioides bcl2-associated X (BAX...                            | 0.0 |  |
| <br>                                                                                                     |     |  |
| <a href="#">Ailuropoda melanoleuca</a> [ <a href="#">carnivores</a> ] taxid 9646                         |     |  |
| <a href="#">ref XM 002917916.1 </a> PREDICTED: Ailuropoda melanoleuca apop...                            | 0.0 |  |
| <br>                                                                                                     |     |  |
| <a href="#">Taeniopygia guttata</a> (zebra finch) [ <a href="#">birds</a> ] taxid 59729                  |     |  |
| <a href="#">ref XM 002199674.1 </a> PREDICTED: Taeniopygia guttata similar...                            | 0.0 |  |
| <br>                                                                                                     |     |  |
| <a href="#">Bos grunniens</a> (yak) [ <a href="#">even-toed ungulates</a> ] taxid 30521                  |     |  |
| <a href="#">gb AY450350.1 </a> Bos grunniens apoptosis regulator bax-alpha...                            | 0.0 |  |
| <br>                                                                                                     |     |  |
| <a href="#">Ictalurus furcatus</a> [ <a href="#">bony fishes</a> ] taxid 66913                           |     |  |
| <a href="#">gb HP432380.1 </a> TSA: Ictalurus furcatus Contig02971.Icfu mR...                            | 0.0 |  |
| <a href="#">gb GU588167.1 </a> Ictalurus furcatus clone CBZF10821 apoptosi...                            | 0.0 |  |
| <br>                                                                                                     |     |  |
| <a href="#">Oncorhynchus mykiss</a> [ <a href="#">bony fishes</a> ] taxid 8022                           |     |  |
| <a href="#">gb BT074328.1 </a> Oncorhynchus mykiss clone omyk-evo-502-314 ...                            | 0.0 |  |
| <br>                                                                                                     |     |  |
| <a href="#">Gallus gallus</a> (bantam, ...) [ <a href="#">birds</a> ] taxid 9031                         |     |  |
| <a href="#">gb AF120210.1 </a> <a href="#">AF120210</a> Gallus gallus myeloid cell leukemia...           | 0.0 |  |
| <br>                                                                                                     |     |  |
| <a href="#">Salmo salar</a> [ <a href="#">bony fishes</a> ] taxid 8030                                   |     |  |
| <a href="#">gb BT048648.1 </a> Salmo salar clone ssal-eve-501-321 Apoptosi...                            | 0.0 |  |
| <a href="#">gb BT044708.1 </a> Salmo salar clone ssal-rgf-501-217 Apoptosi...                            | 0.0 |  |
| <a href="#">gb BT050190.1 </a> Salmo salar clone ssal-evd-538-260 Apoptosi...                            | 0.0 |  |
| <a href="#">gb BT125178.1 </a> Salmo salar clone ssal-eve-507-043 Apoptosi...                            | 0.0 |  |
| <a href="#">gb BT047644.2 </a> Salmo salar clone ssal-eve-576-277 Apoptosi...                            | 0.0 |  |

## Taxonomy Report

|                               |          |         |                                                                           |
|-------------------------------|----------|---------|---------------------------------------------------------------------------|
| root                          | 107 hits | 39 orgs |                                                                           |
| Metazoa                       | 100 hits | 38 orgs | [cellular organisms; Eukaryota; Fungi/Metazoa group]                      |
| Eumetazoa                     | 99 hits  | 37 orgs |                                                                           |
| Cnidaria                      | 4 hits   | 3 orgs  |                                                                           |
| Hexacorallia                  | 2 hits   | 2 orgs  | [Anthozoa]                                                                |
| Acropora millepora            | 1 hits   | 1 orgs  | [Scleractinia; Astrocoeniina; Acroporidae; Acropora]                      |
| Nematostella vectensis        | 1 hits   | 1 orgs  | [Actiniaria; Edwardsiidae; Nematostella]                                  |
| Hydra magnipapillata          | 2 hits   | 1 orgs  | [Hydrozoa; Hydroida; Anthomedusae; Hydridae; Hydra]                       |
| Coelomata                     | 95 hits  | 34 orgs | [Bilateria]                                                               |
| Deuterostomia                 | 93 hits  | 32 orgs |                                                                           |
| Chordata                      | 91 hits  | 31 orgs |                                                                           |
| Ciona intestinalis            | 2 hits   | 1 orgs  | [Tunicata; Ascidiacea; Enterogona; Phlebobranchia; Cionidae; Ciona]       |
| Euteleostomi                  | 89 hits  | 30 orgs | [Craniata; Vertebrata; Gnathostomata; Teleostomi]                         |
| Tetrapoda                     | 73 hits  | 23 orgs | [Sarcopterygii]                                                           |
| Amniota                       | 65 hits  | 21 orgs |                                                                           |
| Theria                        | 63 hits  | 19 orgs | [Mammalia]                                                                |
| Monodelphis domestica         | 1 hits   | 1 orgs  | [Metatheria; Didelphimorphia; Didelphidae; Didelphinae; Monodelphis]      |
| Eutheria                      | 62 hits  | 18 orgs |                                                                           |
| Euarchontoglires              | 49 hits  | 10 orgs |                                                                           |
| Glires                        | 22 hits  | 6 orgs  |                                                                           |
| Murioidea                     | 19 hits  | 5 orgs  | [Rodentia; Sciurognathi]                                                  |
| Murinae                       | 17 hits  | 3 orgs  | [Muridae]                                                                 |
| Mus musculus                  | 8 hits   | 1 orgs  | [Mus; Mus]                                                                |
| Rattus                        | 9 hits   | 2 orgs  |                                                                           |
| Rattus norvegicus             | 8 hits   | 1 orgs  |                                                                           |
| Rattus sp.                    | 1 hits   | 1 orgs  | [unclassified Rattus]                                                     |
| Cricetinae                    | 2 hits   | 2 orgs  | [Cricetidae]                                                              |
| Cricetulus griseus            | 1 hits   | 1 orgs  | [Cricetulus]                                                              |
| Mesocricetus auratus          | 1 hits   | 1 orgs  | [Mesocricetus]                                                            |
| Oryctolagus cuniculus         | 3 hits   | 1 orgs  | [Lagomorpha; Leporidae; Oryctolagus]                                      |
| Simiiformes                   | 27 hits  | 4 orgs  | [Primates; Haplorrhini]                                                   |
| Callithrix jacchus            | 1 hits   | 1 orgs  | [Platyrrhini; Cebidae; Callitrichinae; Callitrix]                         |
| Catarrhini                    | 26 hits  | 3 orgs  |                                                                           |
| Homininae                     | 22 hits  | 2 orgs  | [Hominoidea; Hominidae]                                                   |
| Pan troglodytes               | 1 hits   | 1 orgs  | [Pan]                                                                     |
| Homo sapiens                  | 21 hits  | 1 orgs  | [Homo]                                                                    |
| Macaca mulatta                | 4 hits   | 1 orgs  | [Cercopithecoidea; Cercopithecidae; Cercopithecinae; Macaca]              |
| Laurasiatheria                | 13 hits  | 8 orgs  |                                                                           |
| Cetartiodactyla               | 8 hits   | 5 orgs  |                                                                           |
| Sus scrofa                    | 1 hits   | 1 orgs  | [Suina; Suidae; Sus]                                                      |
| Pecora                        | 7 hits   | 4 orgs  | [Ruminantia]                                                              |
| Bovidae                       | 6 hits   | 3 orgs  |                                                                           |
| Bos                           | 5 hits   | 2 orgs  | [Bovinae]                                                                 |
| Bos taurus                    | 4 hits   | 1 orgs  |                                                                           |
| Bos grunniens                 | 1 hits   | 1 orgs  |                                                                           |
| Ovis aries                    | 1 hits   | 1 orgs  | [Caprinae; Ovis]                                                          |
| Cervus elaphus                | 1 hits   | 1 orgs  | [Cervidae; Cervinae; Cervus]                                              |
| Carnivora                     | 5 hits   | 3 orgs  |                                                                           |
| Caniformia                    | 3 hits   | 2 orgs  |                                                                           |
| Canis lupus familiaris        | 2 hits   | 1 orgs  | [Canidae; Canis; Canis lupus]                                             |
| Ailuropoda melanoleuca        | 1 hits   | 1 orgs  | [Ursidae; Ailuropoda]                                                     |
| Felis catus                   | 2 hits   | 1 orgs  | [Feliformia; Felidae; Felinae; Felis]                                     |
| Neognathae                    | 2 hits   | 2 orgs  | [Sauropsida; Sauria; Archosauria; Dinosauria; Saurischia; Theropoda; Coel |
| Taeniopygia guttata           | 1 hits   | 1 orgs  | [Passeriformes; Passeroidea; Estrildidae; Estrildinae; Taeniopygia]       |
| Gallus gallus                 | 1 hits   | 1 orgs  | [Galliformes; Phasianidae; Phasianinae; Gallus]                           |
| Xenopus                       | 8 hits   | 2 orgs  | [Amphibia; Batrachia; Anura; Mesobatrachia; Pipoidea; Pipidae; Xenopodina |
| Xenopus laevis                | 5 hits   | 1 orgs  | [Xenopus]                                                                 |
| Xenopus (Silurana) tropicalis | 3 hits   | 1 orgs  | [Silurana]                                                                |
| Clupeocephala                 | 16 hits  | 7 orgs  | [Actinopterygii; Actinopteri; Neopterygii; Teleostei; Elopoccephala]      |
| Euteleostei                   | 9 hits   | 4 orgs  |                                                                           |
| Percomorpha                   | 3 hits   | 2 orgs  | [Neognathi; Neoteleostei; Eurypterygii; Ctenosquamata; Acanthomorpha; Eua |
| Tetraodon nigroviridis        | 2 hits   | 1 orgs  | [Tetraodontiformes; Tetraodontidae; Tetraodontidae; Tetraodontidae; Tetr  |
| Epinephelus coioides          | 1 hits   | 1 orgs  | [Perciformes; Percoidae; Serranidae; Epinephelinae; Epinephelus]          |
| Salmoninae                    | 6 hits   | 2 orgs  | [Protacanthopterygii; Salmoniformes; Salmonidae; Salmonidae]              |
| Oncorhynchus mykiss           | 1 hits   | 1 orgs  | [Oncorhynchus]                                                            |
| Salmo salar                   | 5 hits   | 1 orgs  | [Salmo]                                                                   |
| Otophysii                     | 7 hits   | 3 orgs  | [Otocephala; Ostariophysi]                                                |
| Danio rerio                   | 4 hits   | 1 orgs  | [Cypriniformes; Cyprinidae; Cyprinidae; Danio]                            |
| Ictalurus                     | 3 hits   | 2 orgs  | [Siluriformes; Siluriformes; Ictaluridae]                                 |
| Ictalurus punctatus           | 1 hits   | 1 orgs  |                                                                           |
| Ictalurus furcatus            | 2 hits   | 1 orgs  |                                                                           |
| Strongylocentrotus purpuratus | 2 hits   | 1 orgs  | [Echinodermata; Eleutherozoa; Echinozoa; Echinoidea; Euechinoidea; Echina |
| Apogastropoda                 | 2 hits   | 2 orgs  | [Protostomia; Mollusca; Gastropoda; Orthogastropoda]                      |

|                                       |        |                                                                                  |
|---------------------------------------|--------|----------------------------------------------------------------------------------|
| . . . . Crepidula fornicata .....     | 1 hits | 1 orgs [Caenogastropoda; Sorbeoconcha; Hypsogastropoda; Littorinimorpha; Calyptr |
| . . . . Plakobranthus ocellatus ..... | 1 hits | 1 orgs [Heterobranchia; Euthyneura; Opisthobranchia; Sacoglossa; Placobranchoide |
| . . Trichoplax adhaerens .....        | 1 hits | 1 orgs [Placozoa; Trichoplax]                                                    |
| . synthetic construct .....           | 7 hits | 1 orgs [other sequences; artificial sequences]                                   |
